## 1 **Mechanical worrying drives cell migration in crowded environments**

2 Erik S. Welf,<sup>1,2,\*</sup> Meghan K. Driscoll,<sup>1,2,\*</sup> Etai Sapoznik,<sup>2</sup> Vasanth S. Murali,<sup>1,2</sup> Andrew Weems,<sup>1,2</sup> Juan  
3 Manuel Garcia-Arcos<sup>3</sup>, Minna Roh-Johnson,<sup>4</sup> Kevin M. Dean,<sup>2</sup> Matthieu Piel,<sup>3</sup> Reto Fiolka,<sup>2,§</sup> Gaudenz  
4 Danuser<sup>1,2,§</sup>

5 <sup>1</sup>Department of Bioinformatics, University of Texas Southwestern Medical Center, Dallas, TX

6 <sup>2</sup>Department of Cell Biology, University of Texas Southwestern Medical Center, Dallas, TX

7 <sup>3</sup>Institut Curie, PSL Research University, CNRS, Paris, France.

8 <sup>4</sup>Department of Biochemistry, School of Medicine, University of Utah, Salt Lake City, UT

9 \*contributed equally

10 <sup>§</sup>Corresponding author, [Gaudenz.Danuser@UTSouthwestern.edu](mailto:Gaudenz.Danuser@UTSouthwestern.edu), [Reto.Fiolka@UTSouthwestern.edu](mailto:Reto.Fiolka@UTSouthwestern.edu)

11

12 **Migratory cells navigate through crowded 3D microenvironments *in vivo*. Amoeboid cells, such as**  
13 **immune cells and some cancer cells, are thought to do so by deforming their bodies to squeeze through**  
14 **tight spaces.<sup>1</sup> Yet large populations of nearly spherical amoeboid cells migrate<sup>2-4</sup> in microenvironments**  
15 **too dense<sup>5,6</sup> to move through without extensive shape deformations. How they do so is unknown. We**  
16 **used high-resolution light-sheet microscopy to visualize metastatic melanoma cells in dense**  
17 **environments, finding that cells maintain a round morphology as they migrate and create a path**  
18 **through which to move via bleb-driven mechanical degradation and subsequent macropinocytosis of**  
19 **extracellular matrix components. Proteolytic degradation of the extracellular matrix via matrix**  
20 **metalloproteinases is not required. Membrane blebs are short-lived relative to the timescale of**  
21 **migration, and thus persistence in their polarization is critical for productive ablation of the**  
22 **extracellular matrix. Interactions between small but long-lived cortical adhesions and collagen at the**  
23 **cell front induce PI-3 Kinase signaling that drive bleb enlargement via branched actin polymerization.**  
24 **Large blebs in turn abrade collagen, creating a feedback between extracellular matrix structure, cell**  
25 **morphology, and cell polarization that results in both path generation and persistent cell movement.**

### 26 **Introduction**

27 Cell migration is critical to processes ranging from embryogenesis and wound healing to cancer  
28 metastasis.<sup>1</sup> When spatially confined, animal and non-animal cells alike exhibit bleb-based motility, a type  
29 of amoeboid migration characterized by weak adhesion and minimal proteolytic destruction of the  
30 surrounding matrix.<sup>7,8</sup> Amoeboid cells can migrate through tight spaces by deforming their body and  
31 nucleus, even to the point of nucleus rupture.<sup>6,9,10</sup> Studies of invasive cancer cells, particularly of  
32 melanoma, have reported that rounded amoeboid cells are enriched at the tumor edge,<sup>11</sup> and can move  
33 through Matrigel and tumor xenografts.<sup>2,12,13</sup> Indeed, the pro-migratory effect of intracellular contractility,  
34 which is associated with rounding and surface blebbing, is well known.<sup>11,13-17</sup> The pronounced rounded  
35 morphology of these cells seems to be at odds with a migration mode that relies on shape deformation.  
36 Round, amoeboid cells have been observed to move in tunnels.<sup>4</sup> Although under some conditions  
37 amoeboid cells secrete matrix metalloproteinases (MMPs),<sup>18</sup> amoeboid migration is not usually  
38 considered a proteolytic migration mode, and so it has been generally assumed that these tunnels were  
39 pre-formed by ‘helper’ cells moving in a mesenchymal manner, a migration mode in which the  
40 extracellular matrix (ECM) is degraded via MMPs.<sup>4</sup> Despite the notion that amoeboid cells cannot remodel  
41 their environment to generate their own paths and thus would be forced to immobility in a very dense  
42 microenvironment, blebbing cells in soft extracellular matrices have been observed to physically

43 manipulate fibers, pushing them out of their way<sup>19</sup> and tugging on them with adhesions,<sup>20</sup> suggesting the  
44 possibility of an amoeboid migration mode enabled by matrix remodeling.

45 To investigate the mechanism of this potentially new path generating migration strategy, we created  
46 dense, yet pliable *in vivo* mimetics by encapsulating cells in fibrous Collagen 1 gels with bulk stiffnesses  
47 on the order of 1 kPa (Advanced biomatrix.com).<sup>21,22</sup> We imaged cells in 3D with high-resolution light-  
48 sheet microscopy at near isotropic ~350 nm resolution, using specially designed sample chambers that do  
49 not interfere with the mechanical properties of the mimetics (Fig. 1a, Movie 1).<sup>23,24</sup> Adsorption of collagen  
50 to hard surfaces increases collagen stiffness near the surface,<sup>25-28</sup> which shifts and eventually diminishes  
51 the rounded, blebbing morphotype. To observe migration of these cells without mechanical interference,  
52 our chambers enabled cell imaging at greater than 1 mm away from any stiff surfaces.

53 To determine whether our *in vivo* mimetics prohibited deformation-based migration through pores, we  
54 fluorescently labeled collagen and then measured collagen pore size.<sup>24,29,30</sup> Although blebs were small  
55 enough to fit inside the pores in the collagen network, the nucleus and cell body of amoeboid melanoma  
56 cells were too large to fit through the existing pores (Fig. 1a,b, Movie 2), thus rendering a deformation-  
57 based mode of migration unlikely. Long-term time-lapse imaging of melanoma cells confirmed that  
58 amoeboid cells were nevertheless able to move through the mimetics while maintaining their largely  
59 spherical shape (Fig. 1c, Extended Data Fig. 1a,b).

60 As a model cell for bleb-based migration through soft crowded environments, we chose metastatic  
61 melanoma cells. *In vivo*, melanoma metastasizes to soft environment such as the brain.<sup>31</sup> Consistent with  
62 these clinical observations, we noted that melanoma in the soft environment of the zebrafish hindbrain  
63 not only have an amoeboid morphology but bleb extensively (Extended Data Fig. 1c). We next tested  
64 whether the amoeboid morphology was associated with melanoma metastatic potential within our *in vivo*  
65 mimetic. We imaged populations of primary melanoma cells that were harvested from patients and then  
66 passaged in a mouse xenotransplantation system.<sup>32,33</sup> Comparing three mechanically distinct collagen  
67 microenvironments, including the mimetic, we found that samples with higher metastatic efficiency were  
68 enriched in the amoeboid morphology compared to the stretched mesenchymal morphology (Figure 1d,  
69 Extended Data Figure 1d,e). Furthermore, using unbiased cell shape motif detection,<sup>34</sup> we discovered that  
70 a parental melanoma cell line (A375P) had a lower average bleb count than a subpopulation of the cell  
71 line that had been enriched for metastatic potential in mouse xenografts (A375M2) (Fig. 1e,f).<sup>35</sup> Together,  
72 these results establish the significance of our experimental system as a model of metastatic cell migration  
73 in soft, ECM-dense tissues.

#### 74 **Migrating amoeboid cells can carve a path without the need for extracellular proteolytic degradation.**

75 To determine how blebbing melanoma cells migrate through soft, dense collagen, we imaged them 24  
76 hours after seeding. Over this time frame, many cells had created tunnels (Fig. 1g). We observed a similar  
77 tunneling phenomenon with a different melanoma cell line (Extended Data Fig. 2a), as well as with  
78 pediatric Ewing sarcoma cells (Extended Data Fig. 2b). Tunnel creation in dense matrices is usually ascribed  
79 to matrix metalloproteinase (MMP)-dependent mesenchymal migration.<sup>3,36</sup> Thus, our finding of an  
80 amoeboid cell morphology associated with a clearly demarcated, cell-generated path seemed paradoxical  
81 in view of the current paradigms of cancer cell motility. To begin to solve this puzzle, we applied a broad  
82 spectrum MMP inhibitor, GM6001,<sup>37,38</sup> and found no effect on the ability of melanoma cells to tunnel (Fig.  
83 1h). The MMP-independence of the migration mode also held when collagen was not first solubilized  
84 using pepsin, which removes a collagen crosslinking site potentially rendering the collagen easier to  
85 digest.<sup>39</sup> Although tunneling is somewhat less frequent in unpepsinized collagen, the pore size is greater

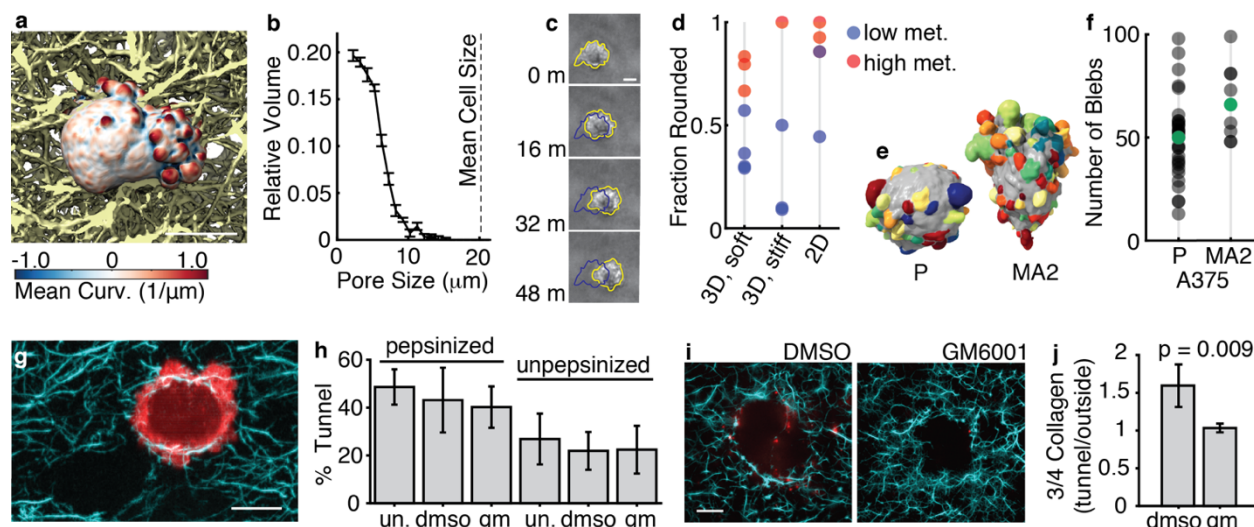

86  
87 **Figure 1. Cells can generate a path through dense collagen without matrix metalloproteinases.** (a) Surface rendering of a 3D  
88 light-sheet microscopy image of a melanoma cell in 3D collagen with collagen fibers behind it shown yellow. (b) Pore size analysis  
89 of 2.0 mg/ml bovine collagen gels showing the fraction of space occupied by a specific pore size ( $n = 6$  gels). Error bars indicate  
90 the standard error of the mean. In comparison, the mean diameter of blebby melanoma cells in these types of gels is  $20 \pm 1 \mu\text{m}$   
91 ( $n = 44$  cells). (c) Time-lapse phase-contrast microscopy images showing the movement of a round, blebby melanoma cell in 3D  
92 collagen. (d) Fraction of melanoma cells with rounded morphology in cell populations extracted from patient-derived xenografts  
93 of high vs low metastatic efficiency under three different microenvironmental conditions. (e) Surface renderings of parental, P,  
94 and metastatic, MA2, A375 melanoma cells. Computationally identified blebs are shown randomly colored. (f) Number of blebs  
95 per cell in the parental, P ( $n = 33$  cells), and metastatic, MA2 ( $n = 9$  cells), cells. Cells with the median number of blebs are indicated  
96 in green and shown in panel e. (g) Maximum intensity projection across  $4.8 \mu\text{m}$  of a light-sheet microscope image of an A375MA2  
97 melanoma cell expressing GFP-F-actin (red) in 3D collagen processed with a steerable filter to enhance edges (cyan). The white  
98 dashed line indicates the location of a tunnel. (h) Percent of cells in tunnels after 18-24 hours in pepsinized or unpepsinized  
99 bovine collagen. Samples were either untreated (un.;  $n = 176$  cells in pepsinized collagen, 67 cells in unpepsinized collagen), or  
100 treated with DMSO ( $n = 52$  cells in pepsinized collagen, 105 cells in unpepsinized collagen), or 40 mM GM6001 (gm;  $n = 82$  cells  
101 in pepsinized collagen, 67 cells in unpepsinized collagen). Error bars indicate 95% confidence intervals calculated using the Normal  
102 approximation for the confidence interval of a binomial distribution. (i) Single optical sections of 3D light-sheet images of collagen  
103 samples containing MV3 cells treated with either DMSO or 40  $\mu\text{M}$  GM6001 for  $\sim 24$  hours. The cyan channel shows collagen with  
104 fibers enhanced by a steerable line filter and the red channel shows  $\frac{3}{4}$  collagen antibody fluorescence near tunnels formed by  
105 cells. (j) Quantification of  $\frac{3}{4}$  collagen antibody intensity inside a tunnel divided by the intensity outside the tunnel in samples  
106 treated with either DMSO or 40  $\mu\text{M}$  GM6001. Error bars show 95% confidence intervals ( $n = 4$  tunnels for each condition). All  
107 scale bars show  $10 \mu\text{m}$ .

108 as is the extent of directional collagen realignment by the cells, suggesting a reduced need to tunnel  
109 (Extended Data Fig. 3). We confirmed that GM6001 inhibited MMP activity by measuring the abundance  
110 of an antibody that recognizes the MMP-cleaved collagen site in tunnels (Fig. 1i,j) and by direct  
111 measurement of MMP enzymatic activity on a synthetic substrate (Extended Data Fig. 2c). Thus, tunneling  
112 is not mediated by the enzymatic activity of MMPs.

### 113 Path generation is mediated by bleb-driven ablation of the extracellular matrix (ECM).

114 To address alternative path generation mechanisms to protease-activity, we analyzed the interactions of  
115 cells with collagen in greater detail. Cells inside tunnels were often highly polarized, with many large blebs  
116 at the cell front facing the enclosed end of the tunnel (Fig. 2a, Movies 3,4). Measuring the difference in  
117 frequencies of protrusive and retractive motion on and off blebs, we found that blebs were on average  
118 protrusive and non-blebs retractive (Fig. 2b), suggesting that blebs are responsible for cell protrusion  
119 through collagen. We next measured the colocalization of blebs with collagen, finding that collagen was  
120 enriched in regions near blebs, but not directly on blebs (Fig. 2c). This is explained by bleb interdigitation



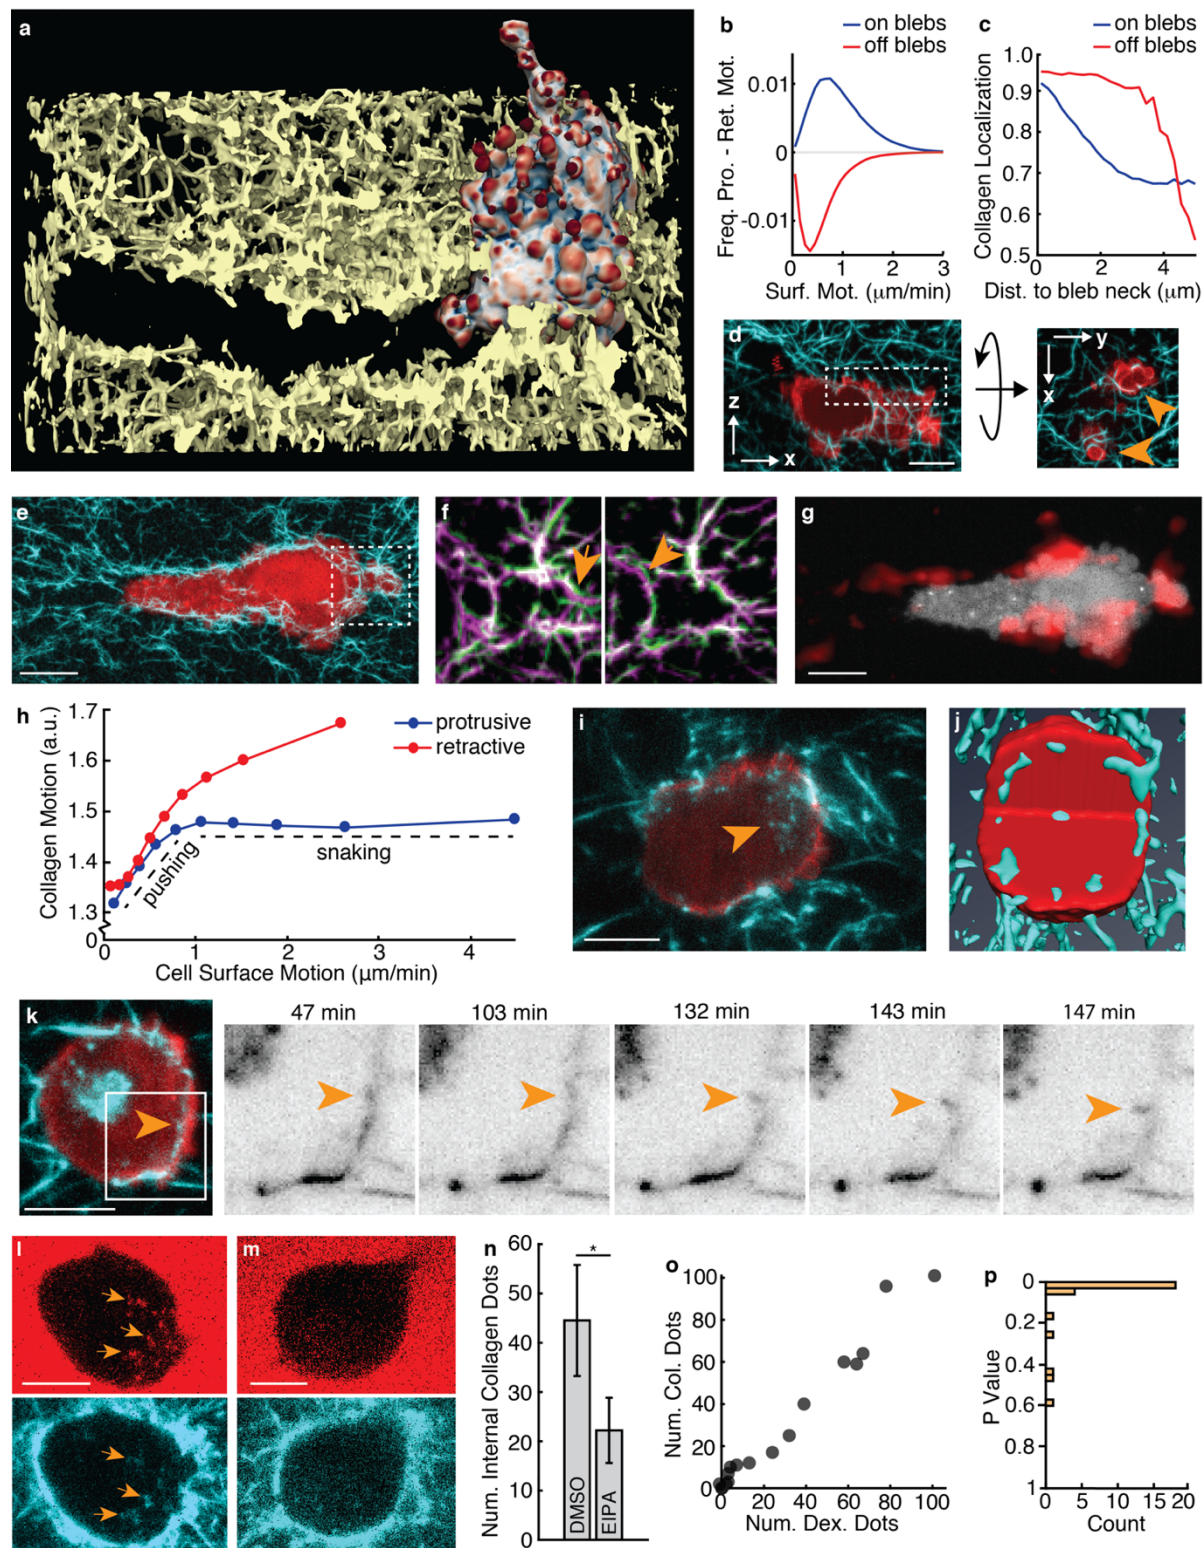

121  
 122 **Figure 2. Persistent agitation and internalization of collagen enables cells to dig tunnels.** (a) Surface rendering of a light-sheet  
 123 microscope image of an MV3 melanoma cell, colored by surface curvature, in 3D collagen. The scale for surface curvature is  
 124 shown in Figure 1A. (b) Frequency of protrusive motion minus the frequency of retractive motion on and off blebs (aggregated  
 125 over  $n = 9$  cells). (c) Collagen intensity on and off blebs as a function of distance to the nearest bleb neck (aggregated over  $n = 23$   
 126 cells). (d) XZ and XY views of maximum intensity projections of light-sheet images of a melanoma cell expressing GFP-AktPH (red)  
 127 interacting with collagen fibers enhanced by steerable line filtering (cyan) and projected over  $5.6 \mu\text{m}$  and  $2.4 \mu\text{m}$ , respectively.



128 The region shown in the XY view is indicated by the dashed box in the XZ view. Orange arrows indicate blebs interdigitating  
129 between collagen fibers. (e) Maximum intensity projection across 3.2  $\mu\text{m}$  of a light-sheet image of a melanoma cell expressing  
130 GFP-AktPH (red) in 3D collagen enhanced by steerable line filtering (cyan). The dashed box indicates the region magnified in panel  
131 F. (f) Overlay of two different time points (green and magenta, separated by 120 seconds) of a maximum intensity projection  
132 over 3.2  $\mu\text{m}$  of a light-sheet microscope image of collagen fibers enhanced by steerable line filtering. Orange arrows indicate the  
133 motion of individual collagen fibers. (g) Collagen motion (red), as measured by 3D optical flow, near a melanoma cell expressing  
134 GFP-AktPH (white), imaged using light-sheet microscopy and shown as a maximum intensity projection over the entire cell. (h)  
135 Collagen motion near the cell surface of blebs associated with either protrusive (blue) or retractive (red) motion (aggregated over  
136  $n = 5$  cells). (i) Maximum intensity projection across 3.2  $\mu\text{m}$  of a light-sheet image of a cell expressing GFP-AktPH (red) in 3D  
137 collagen (cyan). The orange arrow indicates internalized collagen at the front of the cell. (j) Surface rendering of a light-sheet  
138 microscopy image of a melanoma cell expressing GFP-AktPH (red) in 3D collagen (cyan). A quadrant of the cell and collagen is cut  
139 away to show the collagen internalized at the cell periphery. (k) Maximum intensity projection across 3.2  $\mu\text{m}$  of a light-sheet  
140 microscope image of a cell expressing GFP-AktPH (red) in 3D collagen (cyan). The dashed box indicates the region magnified in  
141 the time-lapse panels to the right and the orange arrow indicates a piece of collagen that is broken off and brought in towards  
142 the center of the cell. (L&M) Maximum intensity projection across 3.2  $\mu\text{m}$  of a light-sheet microscope image of MV3 cells  
143 (unlabeled) in 3D collagen (cyan) treated with 70 kDa FITC-dextran (red), as well as either DMSO (l) or 50 mM EIPA (m). The orange  
144 arrows indicates internalized collagen and dextran in intracellular vesicles. (n) Number of internalized collagen fragments in either  
145 DMSO ( $n = 20$  cells) or EIPA-treated ( $n = 23$  cells) cells (difference between conditions per one-sided t-test,  $p = 0.04$ ). (o) Number  
146 of internalized collagen fragments per cell vs. the number of internalized dextran dots in EIPA-treated cells. (p) The p value,  
147 calculated for each cell, corresponding to the likelihood that collagen fluorescence intensity is not elevated at the location of  
148 dextran dots. All scale bars show 10  $\mu\text{m}$ .

149 into pores in the collagen network, resulting in high collagen fiber density at the base of blebs (Fig. 2d).  
150 Then we examined collagen motion, which showed movement of individual collagen fibers at the front of  
151 tunneling cells (Fig. 2e,f). Using a 3D optical flow algorithm designed to capture multi-scale motion both  
152 near and away from cells (Fig. 2g),<sup>40</sup> we compared the collagen speed near blebs with the bleb speed for  
153 both protruding and retracting blebs (Fig. 2h). For protrusive blebs, at low bleb speeds collagen speed  
154 increased linearly with bleb speed, whereas at high bleb speeds collagen motion plateaued, consistent  
155 with bleb interdigitation into collagen pores. For retracting blebs we found that even at high bleb speed,  
156 collagen was pulled in concert with the blebs, meaning that retracting blebs pull collagen towards the cell  
157 surface. Indeed, at the fronts of highly polarized cells, collagen was often enriched into a shell at the cell  
158 periphery alongside extensive internalization of labeled collagen (Fig. 2i,j). Over long periods of time, cells  
159 slowly agitated the collagen shell, breaking off fragments of the collagen and pulling them into the cell  
160 (Fig. 2k).

161 To determine the mechanism of collagen internalization, we incubated cells with high molecular weight  
162 dextran, finding that it was ingested alongside labeled collagen (Fig. 2l). Internalization of large liquid-  
163 phase molecules is indicative of macropinocytosis, since such molecules are excluded from smaller  
164 endocytic vesicles.<sup>41</sup> Treatment with the sodium hydrogen exchange inhibitor 5-(N-ethyl-N-  
165 isopropyl)amiloride (EIPA), an inhibitor of macropinocytosis,<sup>42</sup> decreased the number of dextran-labeled  
166 vesicles and internalized collagen fragments, with the number of dextran vesicles and collagen fragments  
167 highly correlated across cells (Fig. 2m-o). Testing the hypothesis that collagen localization at detected  
168 dextran vesicles was random, we found that the distribution of p-values was heavily tilted towards small  
169 values, indicating likely collagen enrichment within dextran vesicles (Fig. 2p). Furthermore, we did not  
170 observe intracellular vesicles containing fluorescently-labeled clathrin light chain (CLC) that were  
171 associated with internalized collagen (Extended Data Fig. 4), indicating that clathrin-mediated endocytosis  
172 does not contribute to internalization. Thus, we conclude that macropinocytosis is the dominant form of  
173 collagen internalization in this form of path generation for cell migration. The centrality of  
174 macropinocytosis to this form of amoeboid cancer cell migration, combined with its known role in

175 enabling nutrient uptake in depleted cancer microenvironments,<sup>43</sup> highlights the importance of  
176 macropinocytosis to metastasis.

### 177 **Phosphoinositide 3-kinase (PI3K) establishes bleb polarity in feedback with collagen remodeling.**

178 For productive path generation, the slow destruction of dense extracellular matrix at the cell front  
179 critically depends on persistence factors that promote the highly polarized and continuous formation of  
180 large blebs, which abrade and internalize matrix material in a directed fashion. To measure polarization  
181 on the 3D cell surface, we used an approximation of a spherical normal distribution, which has fit  
182 parameters that intuitively correspond to the direction of the peak and the peak's inverse width, here  
183 termed the polarization magnitude (Fig. 3a). Using these statistics, we first confirmed that the distribution  
184 of large blebs was more polarized than the overall bleb distribution (Fig. 3b). Measuring the directional  
185 correlation of large bleb polarization and collagen localization, we next found that large blebs were  
186 systematically biased towards areas of high collagen density (Fig. 3c). Hypothesizing that adhesions might  
187 couple collagen and bleb localization, we found that paxillin-containing adhesion complexes indeed  
188 formed (Fig. 3d, Extended Data Fig. 5) in the direction of the high collagen density at the closed end of the  
189 tunnel (Fig. 3e). A canonical cell polarity factor that is organized by nascent adhesions via focal adhesion  
190 kinase (FAK) is PI3K.<sup>44-46</sup> Similar to the distribution of adhesions, we observed a striking polarization of  
191 PI3K near the closed end of the tunnel (Fig. 3f, Movie 5). This was surprising given that fibroblasts  
192 exhibiting pseudopodial motility in 3D microenvironments do not seem to require polarized PI3K  
193 signaling.<sup>47</sup> Moreover, PI3K signaling was more directionally aligned with large blebs than with blebs of all  
194 sizes (Fig. 3g), suggesting that PI3K signaling is involved specifically in the polarization of large blebs.  
195 Despite their small size, adhesions in the cortical area persisted for several minutes (Fig. 3h), in contrast  
196 to the ~1 min lifetime of similarly-sized nascent adhesions formed in cells on a coverslip (Fig. 3i,j).<sup>48</sup> The  
197 localization and persistence of cortical adhesions at the front of tunneling cells may enable the  
198 recruitment of PI3K to the cell front.

199 To test this hypothesis, we acutely inhibited FAK signaling using a small molecule inhibitor of FAK-kinase  
200 activity. FAK inhibition resulted in a decrease in bleb volume, even though bleb polarization and number  
201 were unaffected (Fig. 3k). PI3K polarization and mean cell surface motion were also decreased (Fig. 3k,  
202 Extended Data Fig. 6). Measuring the full-width half-maxima of the FAK inhibition response times, we  
203 found that PI3K polarization fell first, followed by bleb volume and then cell surface motion. This led us to  
204 conclude that PI3K polarity is upstream of large bleb formation at the cell front. Indeed, stratification of  
205 blebs by volume revealed that large blebs in particular were enriched for high PI3K signaling and also  
206 associated with increased collagen motion (Extended Data Fig. 7).

207 To determine if the relationship between PI3K and bleb size was causative, we used photoactivation to  
208 increase PI3K signaling locally in blebbing cells, resulting in a striking increase in proximal but not distal  
209 bleb size (Fig. 3l, Extended Data Fig. 8, Movie 6). We also pharmacologically inhibited PI3K signaling by  
210 acute addition of a low dose of an inhibitor specific for PI3K $\alpha$ . In the region of former high PI3K activity,  
211 PI3K biosensor intensity and bleb size rapidly decreased, even though de novo bleb formation was not  
212 inhibited (Extended Data Fig. 9, Movie 7). Aggregating over multiple cells, we found that both PI3K  
213 polarization and bleb size were decreased by PI3K inhibition, whereas the number of blebs and bleb  
214 polarization were not affected (Fig. 3m). Altogether, these results indicate that PI3K is responsible for  
215 generating large blebs but does not govern the frequency or location of bleb initiation.

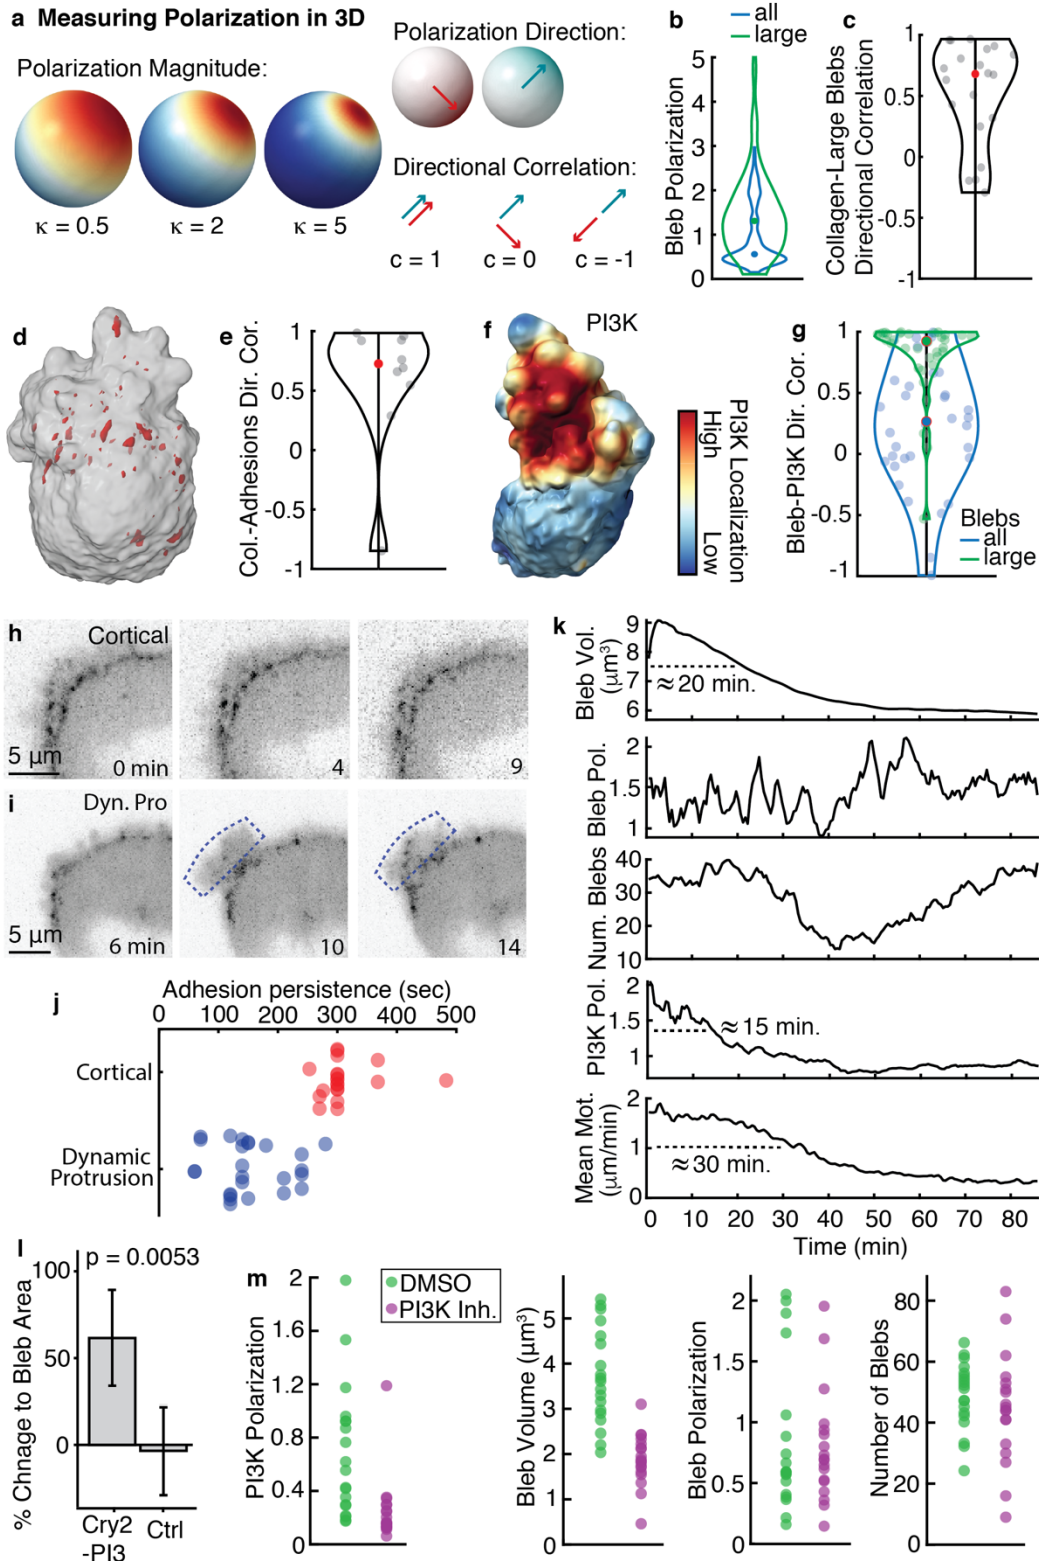

216

217 **Figure 3. Large blebs are polarized to the cell front via a feedback between collagen remodeling, adhesion formation, and PI3K**  
 218 **localization.** (a) Simulated species concentrations illustrating example polarization magnitudes and directional correlations. (b)  
 219 Distributions of polarization magnitudes for all blebs (blue) and for the largest decile of blebs by volume (green). (n = 34 cells) (c)  
 220 Directional correlation of collagen polarization near the cell surface with polarization of the largest decile of blebs. (d) A 3D surface  
 221 rendering of a melanoma cell in 3D collagen with the cell surface shown transparent in gray and paxillin-marked adhesions in red.



222 (e) The directional correlation of collagen polarization with adhesion polarization. (f) A surface rendering of a light-sheet  
223 microscope image of a melanoma cell in collagen, colored by the localization of GFP-AktPH. (g) The directional correlation of bleb  
224 polarization with PI3K polarization for all blebs and for the largest decile of blebs by volume. (h) Time-lapse images of GFP-paxillin  
225 adhesions localized to the cortical region in a worrying cell. (i) Time-lapse images of GFP-paxillin adhesions within a dynamic  
226 protrusion, indicated by the dashed blue box. (j) Adhesion lifetimes for adhesions near the cell cortex (red) and within dynamic  
227 protrusions (blue) in three different cells for each condition. Each data point represents the persistence of a single adhesion. (k)  
228 Representative temporal response of blebs and PI3K signaling in an MV3 cell treated with FAK inhibitor 14. From top to bottom,  
229 shown are mean bleb volume, bleb polarization magnitude, number of blebs, PI3K polarization magnitude, and mean surface  
230 motion magnitude. Dashed lines indicate the approximate full-width half-maximum decay times of measures that are reduced  
231 by FAK inhibition. (l) Change in bleb size due to photoactivation, calculated as mean maximum area per bleb during activation  
232 divided by mean maximum area per bleb in the same region before activation ( $p=0.0053$ , two sided t-test,  $n=6$  regions from 6  
233 cells expressing mCherry-CRY2-iSH2 along with CIBN-CAAX and  $n=8$  regions in 6 cells not expressing cry2-mRuby2-PRL3) (m) Effect  
234 of PI3K $\alpha$  inhibitor IV compared to DMSO control on bleb and PI3K properties in MV3 cells. PI3K polarization ( $p = 0.001$ ) and bleb  
235 volume ( $p = 9 \times 10^{-8}$ ) show statistically significant differences across treatments, whereas bleb polarization ( $p = 0.4$ ) and number  
236 of blebs ( $p = 0.12$ ) do not. Statistical testing was performed with a one-sided t-test.

### 237 **PI3K enlarges blebs by enhancing branched actin polymerization.**

238 The fact that PI3K activity was responsive to FAK manipulation left open the possibility of a mechanical  
239 feedback from large blebs to PI3K, which would also explain the observed persistence in polarization of  
240 blebs and signaling. To test if the presence of large blebs affected PI3K activity, we reduced cell blebbing  
241 via addition of wheat germ agglutinin (WGA), which binds to sialic acid and N-acetylglucosaminyl residues

242 on the extracellular surface of the cell membrane, thereby increasing membrane stiffness.<sup>49,50</sup> We found  
243 that decreasing bleb abundance via WGA decreased the polarity and strength of PI3K signaling (Fig. 4a,  
244 Extended Data Fig. 10), supporting the notion of a sustained feedback between blebbing and local PI3K  
245 activity.

246 We therefore sought to uncover the mechanism that couples PI3K activity and bleb size. Bleb growth is  
247 thought to be driven by pressure-based cytoplasmic flows<sup>51</sup> with actin filament formation only at very late  
248 growth stages to reform the actin cortex.<sup>52</sup> In contrast, PI3K is usually associated with actin-driven  
249 protrusion.<sup>53</sup> Thus, the involvement of PI3K in bleb expansion seemed paradoxical. We noted, however,  
250 that PI3K and actin were directionally correlated (Fig. 4b,c) and that regions of the cell with higher PI3K  
251 activity protruded faster (Fig. 4d). Indeed, in agreement with previous findings,<sup>51</sup> we found that blebs that  
252 ultimately reached a larger size did so by growing faster (Fig. 4e). Inhibition of PI3K activity dramatically  
253 decreased the growth rate and final bleb size (Fig. 4e), confirming that fast bleb growth and large size are  
254 due to PI3K signaling.

255 Given the known association of PI3K with actin-based migration, we wondered if actin polymerization  
256 could be playing a role in bleb growth despite previous reports otherwise. We found that the F-tractin  
257 construct, which localizes to filamentous actin,<sup>54</sup> was absent during bleb expansion and localized only to  
258 the bleb cortex, as previously reported.<sup>52</sup> However, expressing low levels of HALO-tagged actin showed  
259 that actin is present during bleb expansion (Extended Data Fig. 11a). Calculating the ratio of actin to F-  
260 tractin revealed that actin was enriched in blebs relative to filamentous actin (Extended Data Fig. 11b),  
261 raising the possibility that nascent actin filaments formed in blebs, but are not recognized by the F-tractin  
262 probe. To further explore this possibility, we used a TIRF microscope with a high numerical aperture (NA)  
263 objective to image actin in the growing blebs of HeLa cells gene-edited to express a copy of the beta actin  
264 gene fused to GFP. We found that actin filaments are indeed formed in the bleb during expansion (Fig. 4f,  
265 Movie 8). Furthermore, stratification of blebs by their final size revealed that large blebs contained a  
266 significantly higher concentration of actin than small blebs, in particular later in their life (Fig. 4g).

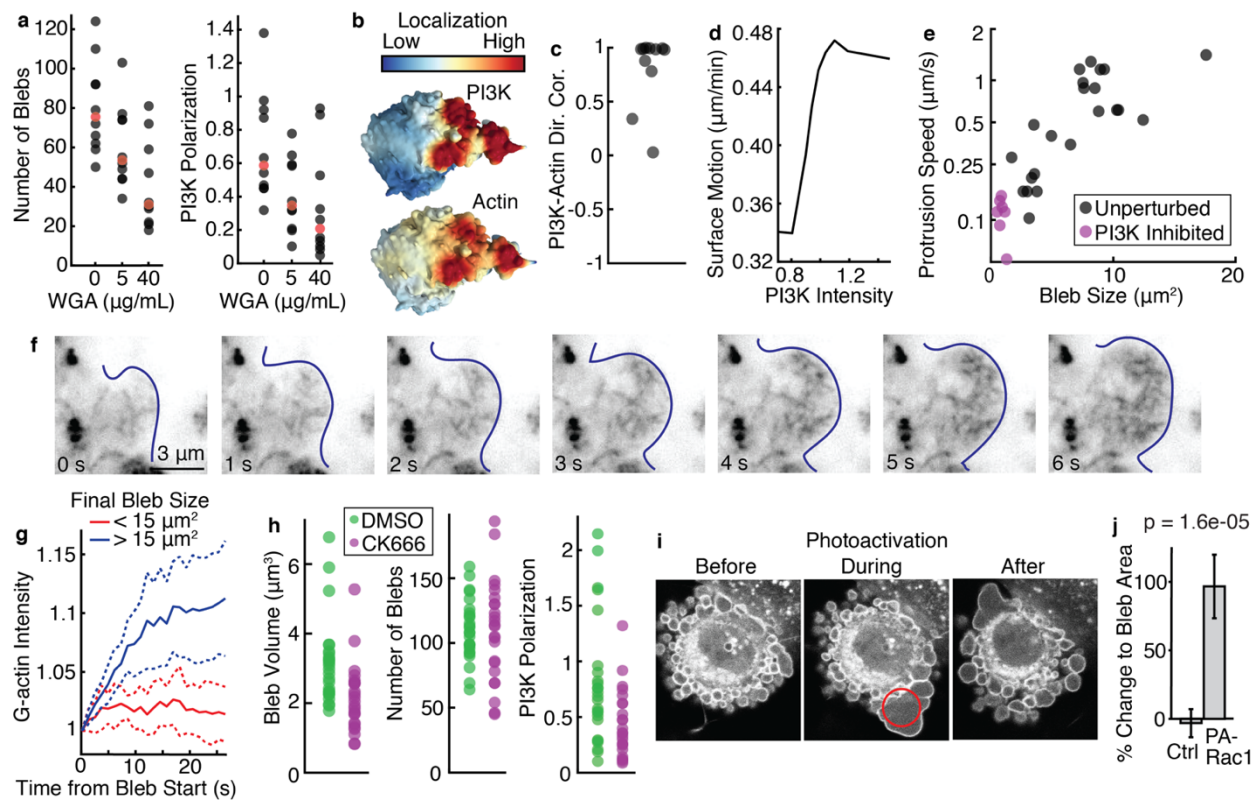

267  
 268 **Figure 4. Bleb size is locally controlled by branched actin polymerization.** (a) The number of blebs and the PI3K polarization in  
 269 individual cells as a function of Wheat Germ Agglutinin (WGA) dose. In each category, the value of the median cell is colored red.  
 270 (b) Surface renderings of 3D light-sheet microscopy images showing GFP-AktPH and HALO-actin intensity on the surface of an  
 271 MV3 cell. (c) Directional correlation of PI3K and actin polarization in individual MV3 cells ( $n=11$  cells). (d) Local cell surface motion  
 272 as a function of local PI3K intensity at the cell surface ( $n=9$  cells). (e) Protrusion speed of individual blebs as a function of  
 273 final bleb size in either unperturbed or PI3K inhibited cells. (f) Time-lapse sequence of TIRF microscopy images of a single bleb in a  
 274 HeLa cell expressing GFP-actin. The bleb edge is indicated by the dark blue line. (g) Mean HALO-actin intensity within large and  
 275 small blebs in a light-sheet image of MV3 cells as a function of time after bleb initiation. Dashed lines represent 95% confidence  
 276 intervals ( $n=12$  blebs from 3 different cells). (h) Effect of Arp2/3 inhibition via CK666 on PI3K and bleb properties, compared to  
 277 DMSO control. PI3K polarization ( $p=0.004$ ) and bleb volume ( $p=0.001$ ) show statistically significant differences across samples,  
 278 whereas the number of blebs do not ( $p=0.48$ ). Statistical testing was performed with a one-sided t-test. (i) Spinning disk confocal  
 279 microscope images showing a single optical slice of mCherry-PA-Rac1 in a mouse embryonic fibroblast before, during and after  
 280 photoactivation of PI3K in the area indicated by a red circle. (j) Change in bleb size due to photoactivation, calculated as the mean  
 281 of the maximum bleb area during activation divided by the mean of the maximum bleb area in the same region before activation  
 282 ( $p=1.6 \times 10^{-5}$ , two sided t-test;  $n=6$  regions expressing mCherry-PA-Rac1,  $n=11$  regions in cells not expressing mCherry-PA-Rac1).

283 The putative link between PI3K signaling and actin polymerization may rest on the Rac1 – WAVE – Arp2/3  
 284 pathway,<sup>44,55</sup> which promotes lamellipodia expansion. To test the involvement of this pathway also in bleb  
 285 expansion, we first blocked Arp2/3 activity by the small molecule inhibitor CK666,<sup>56,57</sup> which decreased  
 286 bleb volume but did not alter bleb number (Fig. 4h). This is consistent with previous findings that both  
 287 genetic and acute inhibition of the Arp2/3 complex reduces bleb size.<sup>58</sup> Coupled with previous findings  
 288 that CK666 treatment does not decrease intracellular pressure<sup>59</sup> and thus is not expected to globally  
 289 decrease the driving force for bleb expansion, our results suggest that active actin polymerization  
 290 contributes to bleb growth, especially in large blebs. To add to this conclusion, we employed a  
 291 photoactivatable Rac1 construct,<sup>60</sup> which allowed us to increase Rac1 activity locally and acutely, avoiding  
 292 the more global and pleiotropic effects Arp2/3 inhibition may exert. Local photoactivation resulted in a  
 293 dramatic, reproducible increase in local bleb size that was immediately reversible upon light cessation

294 (Fig. 4i,j, Movie 9). Our results thus show that the mechanism by which PI3K localization promotes bleb  
295 growth at the front of tunneling cells is via Rac1-mediated actin polymerization.

## 296 **Discussion.**

297 Our data uncover a mode of cell migration that is effective in dense, soft environments. We refer to this  
298 mode as worrying, which means wearing down or tearing repeatedly, like a dog worrying a bone, a  
299 meaning that predates the more figurative use as a term related to anxiety.<sup>61</sup> In the context of cell  
300 migration worrying denotes that the core element of the mechanism is the sustained agitation and tearing  
301 of the extracellular matrix at the cell front by persistently polarized and dynamic cell surface blebs. The  
302 persistence is mounted by a mechanochemical feedback between actin-enforced large bleb formation,  
303 matrix ablation, adhesion signaling, and PI3K/Rac1 triggered activation of actin filament assembly inside  
304 the bleb. The discovery of this self-reinforcing machinery depended on the development of 3D imaging  
305 assays to capture cell dynamic behaviors without mechanical interference from the microscope optics,  
306 computer vision to extract the relations between cell blebbing and signaling, and optogenetic approaches  
307 to acutely interfere with the feedback loop.

308 Our custom-built technology enabled the study of migration in dense, yet soft environments. Not only are  
309 such tissues common *in vivo*, with melanoma in particular known to prefer soft environments,<sup>62</sup> but many  
310 tissues throughout the body are likely mechanical composites with pockets of mechanically soft  
311 microenvironments.<sup>63,64</sup> It is well established that mesenchymal migration, which is especially common in  
312 stiff environments, is facilitated by ECM remodeling leading to tunnel generation and directional fiber  
313 alignment.<sup>65</sup> From the recent discovery that amoeboid immune cells build specialized actin structures to  
314 push fibers out of the way,<sup>66</sup> combined with the results of this study, we now conclude that all major  
315 modes of migration are remodeling modes, in which the environment is at least transiently reorganized.  
316 Hence, alongside the core processes of cell migration established by Abercrombie<sup>67</sup> decades ago, i.e. of  
317 protrusion, adhesion and contraction, we add environmental remodeling as the fourth process. Moving  
318 forward, the use of advanced technologies to dissect migration in ever more complex environments will  
319 be critical to enhancing our understanding of the mechanisms of environmental remodeling and its  
320 integration with the other core processes.

321 Our results additionally underscore how much remains to be understood about blebs. Blebs are known to  
322 play a role in diverse processes beyond cancer cell migration, including apoptosis, cytokinesis, cell  
323 spreading, and virus entry.<sup>68</sup> Although the role of blebs as spatial compartments has been previously  
324 understood, we show here as an additional function for blebs the pushing and pulling of the environment  
325 in order to remodel it. In so doing, we found that bleb expansion is locally controlled by PI3K signaling and  
326 mediated by branched actin polymerization. This raises the possibility that the branched actin machinery  
327 governing bleb expansion in cell migration, may also be critical to other processes involving blebs, for  
328 example organelle segregation into blebs in apoptosis, demanding the need for future studies to  
329 understand how cellular control of blebbing enables critical cell functions.

## 330 **Acknowledgments**

331 We thank Allan Zhang for manually tracking the cells imaged via phase-contrast microscopy, Ugur  
332 Eskiocak, Elena Piskounova, Arin Aurora, and Sean Morrison for providing primary melanoma cells. We  
333 thank Stefan Wieser and Verena Ruprecht for use of their custom high NA TIRF microscope and Philippe  
334 Roudot for advice using the optical flow algorithm. We also thank Alba Diz-Muñoz and Jörg Renkawitz for  
335 kindly commenting on the manuscript. Cell and collagen rendering was performed with UCSF ChimeraX,  
336 developed by the Resource for Biocomputing, Visualization, and Informatics at the University of California,



337 San Francisco, with support from National Institutes of Health R01-GM129325 and the Office of Cyber  
338 Infrastructure and Computational Biology, National Institute of Allergy and Infectious Diseases. This work  
339 was supported by the following grants: K25CA204526 to ESW, K99GM123221 to MKD, INSERM ITMO  
340 Cancer Plan Cancer 2015-2020 to MP, Fondation ARC no. DOC20190508743 PhD fellowship to WMG-A,  
341 NIH R33CA235254 and R35GM133522 to RF, Cancer Prevention Research Institute of Texas grant  
342 RR160057 to RF, and R35-GM136428 to GD.

#### 343 **Competing Interests**

344 The authors declare no competing interests.

345

#### 346 **Data Availability**

347 The data that support the findings of this study are available from the corresponding authors upon  
348 reasonable request.

349

#### 350 **Code Availability**

351 Much of the code used in this study was associated with previously published methods papers and is  
352 available at <https://github.com/DanuserLab>. All remaining code will be made available at that repository  
353 upon publication.

#### 354 **References**

- 355 1 Yamada, K. M. & Sixt, M. Mechanisms of 3D cell migration. *Nat Rev Mol Cell Biol* **20**, 738-752,  
356 (2019).
- 357 2 Sahai, E. & Marshall, C. J. Differing modes of tumour cell invasion have distinct requirements for  
358 Rho/ROCK signalling and extracellular proteolysis. *Nature Cell Biology* **5**, 711-719, (2003).
- 359 3 Wolf, K., Mazo, I., Leung, H., Engelke, K., von Andrian, U. H., Deryugina, E. I., Strongin, A. Y.,  
360 Brocker, E. B. & Friedl, P. Compensation mechanism in tumor cell migration: Mesenchymal-  
361 amoeboid transition after blocking of pericellular proteolysis. *Journal of Cell Biology* **160**, 267-277,  
362 (2003).
- 363 4 Paul, C. D., Mistriotis, P. & Konstantopoulos, K. Cancer cell motility: lessons from migration in  
364 confined spaces. *Nat Rev Cancer* **17**, 131-140, (2017).
- 365 5 Zaman, M. H., Trapani, L. M., Sieminski, A. L., Mackellar, D., Gong, H., Kamm, R. D., Wells, A.,  
366 Lauffenburger, D. A. & Matsudaira, P. Migration of tumor cells in 3D matrices is governed by  
367 matrix stiffness along with cell-matrix adhesion and proteolysis. *Proc Natl Acad Sci U S A* **103**,  
368 10889-10894, (2006).
- 369 6 Wolf, K., te Lindert, M., Krause, M., Alexander, S., te Riet, J., Willis, A. L., Hoffman, R. M., Figdor,  
370 C. G., Weiss, S. J. & Friedl, P. Physical limits of cell migration: Control by ECM space and nuclear  
371 deformation and tuning by proteolysis and traction force. *Journal of Cell Biology* **201**, 1069-1084,  
372 (2013).
- 373 7 Ruprecht, V., Wieser, S., Callan-Jones, A., Smutny, M., Morita, H., Sako, K., Barone, V., Ritsch-  
374 Marte, M., Sixt, M., Voituriez, R. & Heisenberg, C. P. Cortical contractility triggers a stochastic  
375 switch to fast amoeboid cell motility. *Cell* **160**, 673-685, (2015).
- 376 8 Brunet, T., Albert, M., Roman, W., Coyle, M. C., Spitzer, D. C. & King, N. A flagellate-to-amoeboid  
377 switch in the closest living relatives of animals. *Elife* **10**, (2021).
- 378 9 Lammermann, T., Bader, B. L., Monkley, S. J., Worbs, T., Wedlich-Soldner, R., Hirsch, K., Keller, M.,  
379 Forster, R., Critchley, D. R., Fassler, R. & Sixt, M. Rapid leukocyte migration by integrin-  
380 independent flowing and squeezing. *Nature* **453**, 51-55, (2008).

- 381 10 Raab, M., Gentili, M., de Belly, H., Thiam, H. R., Vargas, P., Jimenez, A. J., Lautenschlaeger, F.,  
382 Voituriez, R., Lennon-Dumenil, A. M., Manel, N. & Piel, M. ESCRT III repairs nuclear envelope  
383 ruptures during cell migration to limit DNA damage and cell death. *Science* **352**, 359-362, (2016).
- 384 11 Georgouli, M., Herraiz, C., Crosas-Molist, E., Fanshawe, B., Maiques, O., Perdrix, A., Pandya, P.,  
385 Rodriguez-Hernandez, I., Ilieva, K. M., Cantelli, G., Karagiannis, P., Mele, S., Lam, H., Josephs, D.  
386 H., Matias-Guiu, X., Marti, R. M., Nestle, F. O., Orgaz, J. L., Malanchi, I., Fruhwirth, G. O.,  
387 Karagiannis, S. N. & Sanz-Moreno, V. Regional Activation of Myosin II in Cancer Cells Drives Tumor  
388 Progression via a Secretory Cross-Talk with the Immune Microenvironment. *Cell* **176**, 757-774  
389 e723, (2019).
- 390 12 Pinner, S. & Sahai, E. PDK1 regulates cancer cell motility by antagonising inhibition of ROCK1 by  
391 RhoE. *Nat Cell Biol* **10**, 127-137, (2008).
- 392 13 Sanz-Moreno, V., Gaggioli, C., Yeo, M., Albregues, J., Wallberg, F., Viros, A., Hooper, S., Mitter,  
393 R., Feral, C. C., Cook, M., Larkin, J., Marais, R., Meneguzzi, G., Sahai, E. & Marshall, C. J. ROCK and  
394 JAK1 signaling cooperate to control actomyosin contractility in tumor cells and stroma. *Cancer*  
395 *Cell* **20**, 229-245, (2011).
- 396 14 Gadea, G., de Toledo, M., Anguille, C. & Roux, P. Loss of p53 promotes RhoA-ROCK-dependent cell  
397 migration and invasion in 3D matrices. *Journal of Cell Biology* **178**, 23-30, (2007).
- 398 15 Madsen, C. D., Hooper, S., Tozluoglu, M., Bruckbauer, A., Fletcher, G., Epler, J. T., Bates, P. A.,  
399 Thompson, B. & Sahai, E. STRIPAK components determine mode of cancer cell migration and  
400 metastasis. *Nat Cell Biol* **17**, 68-80, (2015).
- 401 16 Sadok, A., McCarthy, A., Caldwell, J., Collins, I., Garrett, M. D., Yeo, M., Hooper, S., Sahai, E.,  
402 Kuemper, S., Mardakheh, F. K. & Marshall, C. J. Rho kinase inhibitors block melanoma cell  
403 migration and inhibit metastasis. *Cancer Res* **75**, 2272-2284, (2015).
- 404 17 Rodriguez-Hernandez, I., Maiques, O., Kohlhammer, L., Cantelli, G., Perdrix-Rosell, A., Monger, J.,  
405 Fanshawe, B., Bridgeman, V. L., Karagiannis, S. N., Penin, R. M., Marcolval, J., Marti, R. M., Matias-  
406 Guiu, X., Fruhwirth, G. O., Orgaz, J. L., Malanchi, I. & Sanz-Moreno, V. WNT11-FZD7-DAAM1  
407 signalling supports tumour initiating abilities and melanoma amoeboid invasion. *Nat Commun* **11**,  
408 5315, (2020).
- 409 18 Orgaz, J. L., Pandya, P., Dalmeida, R., Karagiannis, P., Sanchez-Laorden, B., Viros, A., Albregues,  
410 J., Nestle, F. O., Ridley, A. J., Gaggioli, C., Marais, R., Karagiannis, S. N. & Sanz-Moreno, V. Diverse  
411 matrix metalloproteinase functions regulate cancer amoeboid migration. *Nat Commun* **5**, 4255,  
412 (2014).
- 413 19 Wyckoff, J. B., Pinner, S. E., Gschmeissner, S., Condeelis, J. S. & Sahai, E. ROCK- and myosin-  
414 dependent matrix deformation enables protease-independent tumor-cell invasion in vivo. *Curr*  
415 *Biol* **16**, 1515-1523, (2006).
- 416 20 Guzman, A., Avard, R. C., Devanny, A. J., Kweon, O. S. & Kaufman, L. J. Delineating the role of  
417 membrane blebs in a hybrid mode of cancer cell invasion in three-dimensional environments. *J*  
418 *Cell Sci* **133**, (2020).
- 419 21 Bordeleau, F., Mason, B. N., Lollis, E. M., Mazzola, M., Zanotelli, M. R., Somasegar, S., Califano, J.  
420 P., Montague, C., LaValley, D. J., Huynh, J., Mencia-Trinchant, N., Negron Abril, Y. L., Hassane, D.  
421 C., Bonassar, L. J., Butcher, J. T., Weiss, R. S. & Reinhart-King, C. A. Matrix stiffening promotes a  
422 tumor vasculature phenotype. *Proc Natl Acad Sci U S A* **114**, 492-497, (2017).
- 423 22 Burla, F., Dussi, S., Martinez-Torres, C., Tauber, J., van der Gucht, J. & Koenderink, G. H.  
424 Connectivity and plasticity determine collagen network fracture. *Proc Natl Acad Sci U S A* **117**,  
425 8326-8334, (2020).
- 426 23 Dean, K. M., Roudot, P., Welf, E. S., Danuser, G. & Fiolka, R. Deconvolution-free Subcellular  
427 Imaging with Axially Swept Light Sheet Microscopy. *Biophys. J.* **108**, 2807-2815, (2015).

- 428 24 Welf, E. S., Driscoll, M. K., Dean, K. M., Schafer, C., Chu, J., Davidson, M. W., Lin, M. Z., Danuser,  
429 G. & Fiolka, R. Quantitative Multiscale Cell Imaging in Controlled 3D Microenvironments. *Dev. Cell*  
430 **36**, 462-475, (2016).
- 431 25 Ma, X., Schickel, M. E., Stevenson, M. D., Sarang-Sieminski, A. L., Gooch, K. J., Ghadiali, S. N. &  
432 Hart, R. T. Fibers in the extracellular matrix enable long-range stress transmission between cells.  
433 *Biophys J* **104**, 1410-1418, (2013).
- 434 26 Provenzano, P. P., Inman, D. R., Eliceiri, K. W. & Keely, P. J. Matrix density-induced  
435 mechanoregulation of breast cell phenotype, signaling and gene expression through a FAK-ERK  
436 linkage. *Oncogene* **28**, 4326-4343, (2009).
- 437 27 Rao, S. S., Benti, S., DeJesus, J., Larison, J., Hissong, A., Dupaix, R., Sarkar, A. & Winter, J. O.  
438 Inherent interfacial mechanical gradients in 3D hydrogels influence tumor cell behaviors. *PLoS*  
439 *One* **7**, e35852, (2012).
- 440 28 Wang, H., Abhilash, A. S., Chen, C. S., Wells, R. G. & Shenoy, V. B. Long-range force transmission  
441 in fibrous matrices enabled by tension-driven alignment of fibers. *Biophys J* **107**, 2592-2603,  
442 (2014).
- 443 29 Aguet, F., Jacob, M. & Unser, M. Three-dimensional feature detection using optimal steerable  
444 filters. *IEEE Image. Proc.* **2**, 1158-1161, (2005).
- 445 30 Lomakin, A. J., Cattin, C. J., Cuvelier, D., Alraies, Z., Molina, M., Nader, G. P. F., Srivastava, N., Saez,  
446 P. J., Garcia-Arcos, J. M., Zhitnyak, I. Y., Bhargava, A., Driscoll, M. K., Welf, E. S., Fiolka, R., Petrie,  
447 R. J., De Silva, N. S., Gonzalez-Granado, J. M., Manel, N., Lennon-Dumenil, A. M., Muller, D. J. &  
448 Piel, M. The nucleus acts as a ruler tailoring cell responses to spatial constraints. *Science* **370**,  
449 (2020).
- 450 31 Achrol, A. S., Rennert, R. C., Anders, C., Soffiatti, R., Ahluwalia, M. S., Nayak, L., Peters, S., Arvold,  
451 N. D., Harsh, G. R., Steeg, P. S. & Chang, S. D. Brain metastases. *Nat Rev Dis Primers* **5**, 5, (2019).
- 452 32 Quintana, E., Piskounova, E., Shackleton, M., Weinberg, D., Eskiocak, U., Fullen, D. R., Johnson, T.  
453 M. & Morrison, S. J. Human melanoma metastasis in NSG mice correlates with clinical outcome in  
454 patients. *Sci Transl Med* **4**, 159ra149, (2012).
- 455 33 Zaritsky, A., Jamieson, A. R., Welf, E. S., Nevarez, A., Cillay, J., Eskiocak, U., Cantarel, B. L. &  
456 Danuser, G. Interpretable deep learning of label-free live cell images uncovers functional  
457 hallmarks of highly-metastatic melanoma. *BioRxiv*, (2020).
- 458 34 Driscoll, M. K., Welf, E. S., Jamieson, A. R., Dean, K. M., Isogai, T., Fiolka, R. & Danuser, G. Robust  
459 and automated detection of subcellular morphological motifs in 3D microscopy images. *Nat*  
460 *Methods*, (2019).
- 461 35 Clark, E. A., Golub, T. R., Lander, E. S. & Hynes, R. O. Genomic analysis of metastasis reveals an  
462 essential role for RhoC. *Nature* **406**, 532-535, (2000).
- 463 36 Kessenbrock, K., Plaks, V. & Werb, Z. Matrix metalloproteinases: regulators of the tumor  
464 microenvironment. *Cell* **141**, 52-67, (2010).
- 465 37 Grobely, D., Poncz, L. & Galaray, R. E. Inhibition of human skin fibroblast collagenase,  
466 thermolysin, and *Pseudomonas aeruginosa* elastase by peptide hydroxamic acids. *Biochemistry*  
467 **31**, 7152-7154, (1992).
- 468 38 Winer, A., Adams, S. & Mignatti, P. Matrix Metalloproteinase Inhibitors in Cancer Therapy: Turning  
469 Past Failures Into Future Successes. *Mol Cancer Ther* **17**, 1147-1155, (2018).
- 470 39 Sabeh, F., Shimizu-Hirota, R. & Weiss, S. J. Protease-dependent versus -independent cancer cell  
471 invasion programs: three-dimensional amoeboid movement revisited. *Journal of Cell Biology* **185**,  
472 11-19, (2009).
- 473 40 Manandhar, S., Bouthemy, P., Welf, E., Danuser, G., Roudot, P. & Kervrann, C. 3D flow field  
474 estimation and assessment for live cell fluorescence microscopy. *Bioinformatics* **36**, 1317-1325,  
475 (2020).
- 476 41 Kerr, M. C. & Teasdale, R. D. Defining macropinocytosis. *Traffic* **10**, 364-371, (2009).



- 477 42 Masereel, B., Pochet, L. & Laeckmann, D. An overview of inhibitors of Na(+)/H(+) exchanger. *Eur J*  
478 *Med Chem* **38**, 547-554, (2003).
- 479 43 Stow, J. L., Hung, Y. & Wall, A. A. Macropinocytosis: Insights from immunology and cancer. *Curr*  
480 *Opin Cell Biol* **65**, 131-140, (2020).
- 481 44 Chen, H. C. & Guan, J. L. Association of focal adhesion kinase with its potential substrate  
482 phosphatidylinositol 3-kinase. *Proc Natl Acad Sci U S A* **91**, 10148-10152, (1994).
- 483 45 Johnson, H. E., King, S. J., Asokan, S. B., Rotty, J. D., Bear, J. E. & Haugh, J. M. F-actin bundles direct  
484 the initiation and orientation of lamellipodia through adhesion-based signaling. *Journal of Cell*  
485 *Biology* **208**, 443-455, (2015).
- 486 46 Welf, E. S., Ahmed, S., Johnson, H. E., Melvin, A. T. & Haugh, J. M. Migrating fibroblasts reorient  
487 directionality by a metastable, PI3K-dependent mechanism. *Journal of Cell Biology* **197**, 105-114,  
488 (2012).
- 489 47 Petrie, R. J., Gavara, N., Chadwick, R. S. & Yamada, K. M. Nonpolarized signaling reveals two  
490 distinct modes of 3D cell migration. *Journal of Cell Biology* **197**, 439-455, (2012).
- 491 48 Choi, C. K., Vicente-Manzanares, M., Zareno, J., Whitmore, L. A., Mogilner, A. & Horwitz, A. R.  
492 Actin and alpha-actinin orchestrate the assembly and maturation of nascent adhesions in a  
493 myosin II motor-independent manner. *Nat Cell Biol* **10**, 1039-1050, (2008).
- 494 49 Charras, G. T., Yarrow, J. C., Horton, M. A., Mahadevan, L. & Mitchison, T. J. Non-equilibration of  
495 hydrostatic pressure in blebbing cells. *Nature* **435**, 365-369, (2005).
- 496 50 Evans, E. & Leung, A. Adhesivity and rigidity of erythrocyte membrane in relation to wheat germ  
497 agglutinin binding. *Journal of Cell Biology* **98**, 1201-1208, (1984).
- 498 51 Cunningham, C. C. Actin polymerization and intracellular solvent flow in cell surface blebbing.  
499 *Journal of Cell Biology* **129**, 1589-1599, (1995).
- 500 52 Charras, G. T., Hu, C. K., Coughlin, M. & Mitchison, T. J. Reassembly of contractile actin cortex in  
501 cell blebs. *J. Cell Biol.* **175**, 477-490, (2006).
- 502 53 Funamoto, S., Meili, R., Lee, S., Parry, L. & Firtel, R. A. Spatial and temporal regulation of 3-  
503 phosphoinositides by PI 3-kinase and PTEN mediates chemotaxis. *Cell* **109**, 611-623, (2002).
- 504 54 Schell, M. J., Erneux, C. & Irvine, R. F. Inositol 1,4,5-trisphosphate 3-kinase A associates with F-  
505 actin and dendritic spines via its N terminus. *J Biol Chem* **276**, 37537-37546, (2001).
- 506 55 Welch, H. C., Coadwell, W. J., Stephens, L. R. & Hawkins, P. T. Phosphoinositide 3-kinase-  
507 dependent activation of Rac. *FEBS Lett* **546**, 93-97, (2003).
- 508 56 Bisi, S., Dianza, A., Malinverno, C., Frittoli, E., Palamidessi, A. & Scita, G. Membrane and actin  
509 dynamics interplay at lamellipodia leading edge. *Curr Opin Cell Biol* **25**, 565-573, (2013).
- 510 57 Nolen, B. J., Tomasevic, N., Russell, A., Pierce, D. W., Jia, Z., McCormick, C. D., Hartman, J.,  
511 Sakowicz, R. & Pollard, T. D. Characterization of two classes of small molecule inhibitors of Arp2/3  
512 complex. *Nature* **460**, 1031-1034, (2009).
- 513 58 Bergert, M., Chandradoss, S. D., Desai, R. A. & Paluch, E. Cell mechanics control rapid transitions  
514 between blebs and lamellipodia during migration. *Proc Natl Acad Sci U S A* **109**, 14434-14439,  
515 (2012).
- 516 59 Cartagena-Rivera, A. X., Logue, J. S., Waterman, C. M. & Chadwick, R. S. Actomyosin Cortical  
517 Mechanical Properties in Nonadherent Cells Determined by Atomic Force Microscopy. *Biophys J*  
518 **110**, 2528-2539, (2016).
- 519 60 Wu, Y. I., Frey, D., Lungu, O. I., Jaehrig, A., Schlichting, I., Kuhlman, B. & Hahn, K. M. A genetically  
520 encoded photoactivatable Rac controls the motility of living cells. *Nature* **461**, 104-U111, (2009).
- 521 61 Worry. *Oxford English Dictionary*.
- 522 62 Bras, M. M., Radmacher, M., Sousa, S. R. & Granja, P. L. Melanoma in the Eyes of Mechanobiology.  
523 *Front Cell Dev Biol* **8**, 54, (2020).
- 524 63 Bonnans, C., Chou, J. & Werb, Z. Remodelling the extracellular matrix in development and disease.  
525 *Nat. Rev. Mol. Cell Biol.* **15**, 786-801, (2014).

- 526 64 Handorf, A. M., Zhou, Y., Halanski, M. A. & Li, W. J. Tissue stiffness dictates development,  
527 homeostasis, and disease progression. *Organogenesis* **11**, 1-15, (2015).
- 528 65 Winkler, J., Abisoye-Ogunniyan, A., Metcalf, K. J. & Werb, Z. Concepts of extracellular matrix  
529 remodelling in tumour progression and metastasis. *Nat Commun* **11**, 5120, (2020).
- 530 66 Gaertner, F., Reis-Rodrigues, P., Vries, I. d., Hons, M., Aguilera, J., Riedl, M., Leithner, A., Merrin,  
531 J., Zheden, V., Kaufmann, W. A., Hauschild, R. & Sixt, M. Mechanosensitivity of amoeboid cells  
532 crawling in 3D. *BioRxiv*, (2021).
- 533 67 Abercrombie, M. Croonian lecture, 1978: the crawling movement of metazoan cells. *Proceedings*  
534 *of the Royal Society Series B-Biological Sciences* **207**, 129-147, (1980).
- 535 68 Charras, G. & Paluch, E. Blebs lead the way: How to migrate without lamellipodia. *Nat Rev Mol*  
536 *Cell Biol* **9**, 730-736, (2008).

537

## 538 **Methods**

### 539 **Cell culture and reagents**

540 MV3 cells were obtained from Peter Friedl (MD Anderson Cancer Center, Houston TX). A375 (ATCC® CRL-  
541 1619) and A375MA2 (ATCC® CRL-3223) cells were acquired from ATCC. SKNMC Ewing sarcoma cells were  
542 obtained from the Whitehurst lab at UT Southwestern. MV3, A375, and SKNMC cells were cultured in  
543 DMEM (Gibco) supplemented with 10% fetal bovine serum (FBS; ThermoFisher) at 37 °C and 5% CO<sub>2</sub>.

544 Populations of primary melanoma cells were created from tumors grown in murine xenograft models as  
545 described previously,<sup>1</sup> and provided as a gift by the Laboratory of Sean Morrison (UT Southwestern  
546 Medical Center, Dallas, TX). Briefly, cells were suspended in Leibovitz's L-15 Medium (ThermoFisher)  
547 containing mg/ml bovine serum albumin, 1% penicillin/streptomycin, 10 mM HEPES and 25% high protein  
548 Matrigel (product 354248; BD Biosciences). Subcutaneous injections of human melanoma cells were  
549 performed in the flank of NOD.CB17-Prkdcscid Il2rgtm1Wjl/SzJ (NSG) mice (Jackson Laboratory). These  
550 experiments were performed according to protocols approved by the animal use committees at the  
551 University of Texas Southwestern Medical Center (protocol 2011-0118). After surgical removal, tumors  
552 were mechanically dissociated and subjected to enzymatic digestion for 20 min with 200 U ml<sup>-1</sup>  
553 collagenase IV (Worthington), 5 mM CaCl<sub>2</sub>, and 50 U ml<sup>-1</sup> DNase at 37°C. Cells were filtered through a  
554 40 µm cell strainer to break up cell aggregates and washed through the strainer to remove cells from large  
555 tissue pieces. The cells were then cultured in medium containing the Melanocyte Growth Kit (ATCC PCS-  
556 200-042) and Dermal Cell Basal Medium (ATCC PCS-200-030).

### 557 **Inhibitors**

558 FAK inhibitor 14 was purchased from Tocris (3414). PI3K alpha inhibitor IV was purchased from Santa Cruz  
559 (sc-222170). CK666 was purchased from Millipore Sigma (SML0006). The ¾-collagen antibody was  
560 purchased from Adipogen (AG-25T-011). NEIPA was purchased from Sigma (A3085). WGA was purchased  
561 from VWR (101098-084). 70 kDa Fluorescein isothiocyanate–dextran was purchased from Sigma (46945).  
562 GM6001 was purchased from Sigma (CC1010).

### 563 **MMP activity assay**

564 We used the MMP activity assay kit by Abcam (ab112146) according to their instructions in order to test  
565 the efficiency of MMP inhibitors. MV3 melanoma cells were cultured in a 24 well plate with (a) media with  
566 no cells, (b) cells treated with vehicle (DMSO) control, and (c) cells treated with GM6001 for 24h. Two  
567 positive controls of recombinant human MMP1 and MMP8 from RnD systems (901-MP & 908-MP) were  
568 used for the assay. The control MMPs were dissolved in assay buffer and a 2mM AMPA working solution  
569 was prepared with assay buffer. The MMP and the test samples were mixed 1:1 vol/vol with the AMPA

570 working solution and incubated for 1h at 37 °C. The MMP green substrate working solution was prepared  
571 in assay buffer and then mixed 1:1 vol/vol in the black walled 96 well plate and further incubated for 1h.  
572 The samples were then read on a Biotek, Synergy H1 hybrid plate reader at Ex/Em = 490/525 nm.

### 573 **Recombinant DNA Constructs**

574 The GFP-AktPH construct was obtained from the laboratory of Jason Haugh (North Carolina State  
575 University, Raleigh NC)<sup>2</sup> and cloned into the pLVX-IRES-puro vector (Clontech). The GFP-tractin construct  
576 was a gift from Dyché Mullins (Addgene plasmid # 58473; <http://n2t.net/addgene:58473>;  
577 RRID:Addgene\_58473)<sup>3</sup> and was cloned into the pLVX-IRES-puro vector (Clontech). Paxillin-pEGFP was a  
578 gift from Rick Horwitz (Addgene plasmid # 15233 ; <http://n2t.net/addgene:15233>;  
579 RRID:Addgene\_15233)<sup>4</sup>. mRuby2-CLC was a gift from the laboratory of Sandra Schmid (UT Southwestern  
580 Medical Center). Cells expressing lentiviral vectors were created by following the manufacturer's  
581 instructions for virus preparation and cell infection (Clontech). Cells were selected for expression by  
582 treatment with puromycin, G418, or by fluorescence activated cell sorting.

583 The photoactivatable PI3K construct (Idevall-Hagren et al., 2012) was created by cloning mCherry-CRY2-  
584 iSH2 (Addgene Plasmid #66839) into the pLVX-neo vector (Clontech). The CIBN-CAAX plasmid was  
585 obtained from Addgene (Plasmid #79574) and cloned into the pLVX-puro vector. Cells expressing both the  
586 mCherry-CRY2-iSH2 and the CIBN-CAAX constructs were selected by treatment with 10 mg/mL puromycin  
587 and fluorescence activated cell sorting. It is critical for the two part cry2 photoactivation system that cells  
588 express sufficient concentration of the CIBN-CAAX construct or the cry2 construct will aggregate in the  
589 cytosol instead of being recruited to the membrane. Thus, the optimal ratio of CIBN:cry2 is greater than  
590 one; cells expressing insufficient CIBN-CAAX will not respond to light. We also noted through the course  
591 of our experiments that cells will stop expressing one or both of these constructs if not kept constantly  
592 under selective pressure. Such a loss of expression will result in non-responsive cells. The PA-Rac1  
593 construct was obtained from Yi I. Wu (University of Connecticut Health Center, Farmington, CT).

594 Overexpression of fluorescently tagged monomeric actin can perturb cell cytoskeletal dynamics. To avoid  
595 this artifact while imaging tagged actin, we expressed HALO-tagged actin under the control of a truncated  
596 CMV promoter, which results in lower expression of tagged actin than the full length promoter. The  
597 original actin construct features an 18 amino acid linker between mNeonGreen and actin in a pLVX-  
598 shRNA2 vector and was obtained from Allele Biotech. We truncated the CMV promoter, and replaced the  
599 mNeonGreen fluorophore with the HALO tag sequence. The sequence of the CMV100 promoter region is  
600 as follows, with the CMV sequence highlighted and the start codon in bold:

601 **AGTTATTAATAGTAATCAATTACGGGGTCATTAGTTCATAGCCCATATATGGAGTTCGCGTTACATAAC**  
602 **TTACGGTAAATGGCCGCCTGGCTGACCGCCGCTAGCGCTAACTAGTGCCACCATG**

### 603 **Phase-contrast imaging**

604 Live-cell phase-contrast imaging was performed on a Nikon Ti microscope equipped with an  
605 environmental chamber held at 37°C and 5% CO<sub>2</sub> and imaged with 20x magnification.

### 606 **Cells on top of gels**

607 Collagen slabs were made from rat tail collagen Type 1 (Corning; 354249) at a final concentration of 3  
608 mg/mL, created by mixing with the appropriate volume of 10x PBS and water and neutralized with 1N  
609 NaOH. A total of 200 µL of collagen solution was added to the glass bottom portion of a gamma irradiated  
610 35 mm glass bottom culture dish (MatTek P35G-0-20-C). The dish was then placed in an incubator at 37°C  
611 for 15 minutes to allow for polymerization.

612 Cells were seeded on top of the collagen slab at a final cell count of 5000 cells in 400  $\mu$ L of medium per  
613 dish. The dish was then placed in a 37°C incubator for 4 hours. Following incubation, 1 mL of medium was  
614 gently added to the dish. The medium was gently stirred to suspend debris and unattached cells. The  
615 medium was then drawn off and gently replaced with 2 mL of fresh medium.

### 616 **Cells embedded in 3D collagen**

617 Collagen gels were created by mixing bovine collagen I (Advanced Biomatrix 5005 and 5026) with  
618 concentrated phosphate buffered saline (PBS) and water for a final concentration of 2 mg/mL collagen.  
619 This collagen solution was then brought to pH 7 with 1N NaOH and mixed with cells just prior to incubation  
620 at 37°C to induce collagen polymerization. Cells were suspended using trypsin/EDTA (Gibco), centrifuged  
621 to remove media, and then mixed with collagen just prior to incubation at 37°C to initiate collagen  
622 polymerization. To image collagen fibers, a small amount of collagen was conjugated directly to AlexaFluor  
623 568 dye and mixed with the collagen sample just prior to polymerization. FITC-conjugated collagen was  
624 purchased from Sigma (C4361).

### 625 **3D confocal imaging**

626 The cell/collagen mixture described in the previous section was added to Nunc Lab-Tek II Chambered  
627 Coverglass samples holders with a No. 1.5 borosilicate glass bottom (Thermo Scientific). Cells were fixed  
628 with paraformaldehyde and stained with Hoechst and FITC-phalloidin. Images were acquired on a Zeiss  
629 LSM 880 using a Plan-Apochromat 63x/1.4 Oil objective.

### 630 **Classification of cell morphology**

631 For Figure 1d, we classified the fraction of cells as “rounded” as follows. For cells embedded in 3D collagen,  
632 we labeled as rounded cells with extensive blebbing as well as round cells with few protrusions of any  
633 sort. For cells placed on top of collagen and imaged using phase contrast microscopy, we manually scored  
634 each cell as either rounded or stretched, with the rounded morphology indicating the amoeboid  
635 phenotype.

### 636 **Zebrafish injection and imaging**

637 B16F10 melanoma cells expressing Lifeact-eGFP were injected into the hindbrain ventricle of 2 days post-  
638 fertilization wildtype zebrafish larvae using previously described protocols.<sup>5</sup> Briefly, B16F10 melanoma  
639 cells were suspended in HBSS. 25-50 cancer cells were transplanted into the hindbrain ventricle of  
640 anesthetized larvae. Injected zebrafish larvae were incubated at 31°C with 0.2 mM PTU to prevent  
641 pigment formation. Live-cell *in vivo* imaging was performed using a Zeiss spinning disc microscope with a  
642 QuantEM EMCCD camera.

### 643 **High NA TIRF microscopy**

644 Human cervical adenocarcinoma cells HeLa-Kyoto with TALEN-edited ActB fused with GFP (Collectis,  
645 France) were maintained in DMEM/F12 supplemented with 10% FBS (Invitrogen) at 37°C and 5% CO<sub>2</sub>, and  
646 imaged using CO<sub>2</sub>-independent medium (Invitrogen) supplemented with 10% FBS. Cells were confined by  
647 a PDMS stamp in a non-adhesive, PLL-g-PEG (0.5mg/ml) coated chamber of ~3 $\mu$ m height, as described  
648 previously,<sup>6</sup> and imaged 20 minutes after initiating the confinement to observe actin dynamics within  
649 blebs. The high NA TIRF consisted of a standard setup equipped with a 473nm laser 500mW  
650 (Laserquantum), an objective TIRF NA=1.49 (Olympus), and a camera (Andor Zyla 4.2). A single notch filter  
651 was used in the emission light path to block the laser line at 473 nm (Chroma). Acquisition was controlled  
652 by the Andor SOLIS software.

### 653 **3D cell tracking from phase-contrast movies**



654 Cells were embedded in 2.0 mg/mL pepsinized bovine collagen in Nunc Lab-Tek II Chambered Coverglass  
655 samples holders as described above. Live-cell phase-contrast imaging was performed on a Nikon Ti  
656 microscope as described above. Cells were outlined manually using ImageJ, and position and shape data  
657 were exported for analysis using Matlab. Cell shape was calculated using roundness, given by  
658  $4 \cdot \text{area} / (\pi \cdot \text{major\_axis}^2)$ , and cells were classified as either round (roundness > 0.8) or stretched  
659 (roundness < 0.8). Autocorrelation was calculated using the Matlab function *xcorr*. Cell velocity was  
660 calculated from cell centroid positions.

### 661 **3D light-sheet imaging**

662 3D samples were imaged using either an axially-swept light-sheet microscope<sup>7</sup> or a meSPIM microscope,<sup>8</sup>  
663 both of which provide nearly isotropic, diffraction-limited 3D images. Samples were imaged in phenol red  
664 free DMEM containing 25mM HEPES (ThermoFisher) with 10% FBS and antibiotic-antimycotic (Gibco),  
665 held at 37°C during imaging. Images were collected using sCMOS cameras (Orca Flash4.0 v2, Hamamatsu)  
666 and microscopes were operated using custom Labview software. All software was developed using a 64-  
667 bit version of LabView 2016 equipped with the LabView Run-Time Engine, Vision Development Module,  
668 Vision Run-Time Module and all appropriate device drivers, including NI-RIO Drivers (National  
669 Instruments). Software communicated with the camera via the DCAM-API for the Active Silicon Firebird  
670 frame-grabber and delivered a series of deterministic TTL triggers with a field programmable gate array  
671 (PCIe 7852R, National Instruments). These triggers included analog outputs for control of mirror  
672 galvanometers, piezoelectric actuators, laser modulation and blanking, camera fire and external trigger.  
673 All images were saved in the OME-TIFF format (<https://docs.openmicroscopy.org/ome-model/5.6.3/ome-tiff/>). Some of the core functions and routines in the microscope control software are licensed under a  
674 material transfer agreement from Howard Hughes Medical Institute, Janelia Research Campus.  
675

### 676 **3D cell image analysis**

677 3D light-sheet images of cells were first deconvolved using the Richardson-Lucy algorithm built-in to  
678 Matlab (Mathworks). To reduce deconvolution artifacts, images were apodized, as previously described.<sup>8</sup>  
679 Following deconvolution, we used our previously published u-shape3D analysis framework.<sup>9</sup> to segment  
680 cells, detect blebs, map fluorescence intensity to the cell surface, measure surface motion, and calculate  
681 polarization statistics. Briefly, images of cells were segmented to create a cell surface represented as a 3D  
682 triangle mesh. We used u-shape3D's *twoLevelSurface* segmentation mode, which combines a blurred  
683 image of the cell interior with an automatically thresholded image of the cell surface. Blebs were detected  
684 by decomposing the surface into convex patches, and using a machine learning algorithm to classify the  
685 patches as a bleb or not a bleb. For each patch classified as a bleb, the bleb neck was defined as the  
686 boundary between that patch and neighboring patches. Distance from a bleb neck was calculated at every  
687 face on the mesh as the geodesic distance to the closest bleb neck. To determine the fluorescence  
688 intensity at each mesh face, we used the raw, non-deconvolved, fluorescence image. At each mesh face,  
689 a kd-tree was used to identify the cell-interior voxels within a sampling radius of 1 or 2  $\mu\text{m}$  of the mesh  
690 face. Before averaging the intensity values in these voxels, the intensity values were depth-normalized to  
691 correct for surface-curvature dependent artifacts.<sup>10</sup> The u-shape3D software, as well as the trained  
692 machine learning models used here, are available with the previously published manuscript.<sup>9</sup>

693 Polarization statistics were calculated by mapping data defined on the cell surface to a sphere, and fitting  
694 the mapped data to a 3D von Mises distribution, which is akin to a spherical normal distribution. We  
695 calculated bleb polarization by representing each bleb by the location on the bleb surface farthest from  
696 the bleb neck, with distances measured on the cell surface. Additionally, since the adhesion images had

697 substantial fluorescence background, to measure adhesion polarization, we bandpass filtered the raw  
698 images via a difference of Gaussians procedure, selecting for objects between 1 and 6 pixels in radius.

### 699 **3D collagen image analysis**

700 To enhance linear image features, such as collagen fibers, the 3D collagen images were processed with a  
701 steerable filter of width 2 pixels, as previously described.<sup>8</sup> To emphasize collagen fiber location, some  
702 figure panels, as indicated in the figure legends, show steerable-filter enhanced collagen. Other collagen  
703 images, especially those related to endocytosis, were neither filtered nor deconvolved to avoid the  
704 creation of artifacts. Collagen polarization near the cell surface was measured after mapping image  
705 intensity values from steerable-filtered images onto the cell surface. Following steerable filtering and  
706 automatic thresholding, the nematic order parameter of collagen networks was calculated as described  
707 previously<sup>8</sup>, except that the average fiber directionality in each 3D image was used as the reference  
708 direction. The fiber directionality was calculated at each voxel via a steerable filter. Collagen pore size  
709 analysis was also performed as described previously.<sup>11</sup> Images were filtered and then thresholded at 2.5  
710 times the intensity threshold calculated by Otsu's algorithm.<sup>12</sup> To measure pore sizes, for each image, we  
711 first fitted the largest possible sphere into the collagen pores. We then iteratively fitted the next largest  
712 sphere into the pores space minus the volume of previously fitted spheres until no remaining spheres  
713 above a size threshold would fit. We defined the distribution of collagen pore sizes as the distribution of  
714 fitted sphere diameters. Collagen motion was measured using a previously published 3D optical flow  
715 algorithm.<sup>13</sup> This algorithm combines a matching framework for large displacements across frames with a  
716 variational framework for small displacements. We mapped the magnitude of the collagen motion  
717 calculated via optical flow onto the cell surface using the framework for mapping fluorescence intensity  
718 onto mesh faces described above. To create panel 3H, we separated cell surface motion, aggregated  
719 across multiple cells, into bins by magnitude and found the mean collagen motion magnitude associated  
720 with each bin. The collagen sample moves during imaging, and although the average collagen motion in  
721 each frame was subtracted from the measured collagen velocities, residual local motions contribute to  
722 create a non-zero background collagen motion.

### 723 **3D dextran assay image analysis**

724 To measure the uptake of collagen fragments alongside 70 kDa dextran, we first segmented the cell using  
725 the dextran channel. To do so, we inverted each 3D image, subtracted the median intensity, normalized  
726 by the 99<sup>th</sup> intensity percentile, subtracted the image background, thresholded, morphologically dilated  
727 by 1 pixel, morphologically eroded by 8 pixels, filled holes, and finally selected the largest image  
728 component. Since the cell is morphologically eroded to a greater extent than it is dilated, the cell  
729 segmentation is effectively shrunk, reducing the effect of segmentation errors on later analysis. To detect  
730 dots of endocytosed collagen and dextran, we employed a previously published multiscale stochastic  
731 filter.<sup>14</sup> For this filter, we used scales of 1.5 to 4 pixels, an  $\alpha = 0.01$ , and detected dots only inside the  
732 segmented cell. The p-value distribution shown in Fig. 2o results from testing, for each cell, the hypothesis  
733 that collagen fluorescence intensity is greater at the location of detected dextran dots than elsewhere in  
734 the cell. To calculate the p value for each cell, we randomly picked  $n$  collagen intensity values within the  
735 cell 100,000 times, where  $n$  is the number of detected dextran dots, and calculated the probability that  
736 the mean of the randomly picked values was greater than the mean of the collagen intensity values at the  
737 true detected dextran dots.

### 738 **Photoactivation**

739 Photoactivation of subcellular regions was performed using a 488 nm laser at 10% power via the FRAP  
740 module of a Zeiss LSM780 outfitted with temperature and CO<sub>2</sub> control. Cells for the PI3K optogenetics

741 were treated with 200uM of PI3K inhibitor IV just prior to photo activation. To assess bleb size change in  
742 phase contrast movies, we analyzed multiple blebs within the stimulated region by manually outlining  
743 individual blebs at their largest size using ImageJ. Bleb size was measured prior to activation and during  
744 activation in the same sub-region of the cell.

#### 745 **Visualization and Statistics**

746 3D surface renderings were made in ChimeraX.<sup>15</sup> Colored triangle meshes representing the cell surface  
747 were imported into ChimeraX from u-shape3D as Collada dae files, as previously described.<sup>9</sup> To render  
748 collagen, steerable-filtered images were opened directly in ChimeraX and thresholded. To create the  
749 rendering of adhesions shown in Figure 3d, the raw paxillin images were bandpassed, admitting objects  
750 between 0.5 and 3 pixels in radius, and then median filtered.

751 Figure 2h has histograms with varied bin sizes. To avoid the existence of bins with very little data, each  
752 bin in this panel contains a decile of data. Furthermore, to ease visual interpretation, the time series data  
753 in Figure 3k were smoothed using a moving average filter with a span of 5 frames.

754 All statistical comparisons shown in figures were calculated using a one-sided or two-sided t-test with  $\alpha =$   
755 0.05. Error bars in figures show either 95% confidence intervals or the standard error of the mean, as  
756 stated in the figure legends. Number of cells and/or number of different experiments analyzed are given  
757 in the figure legends.

#### 758 **Methods References**

- 759 1 Quintana, E., Piskounova, E., Shackleton, M., Weinberg, D., Eskiocak, U., Fullen, D. R., Johnson, T.  
760 M. & Morrison, S. J. Human melanoma metastasis in NSG mice correlates with clinical outcome in  
761 patients. *Sci Transl Med* **4**, 159ra149, (2012).
- 762 2 Haugh, J. M., Codazzi, F., Teruel, M. & Meyer, T. Spatial sensing in fibroblasts mediated by 3'  
763 phosphoinositides. *Journal of Cell Biology* **151**, 1269-1280, (2000).
- 764 3 Belin, B. J., Goins, L. M. & Mullins, R. D. Comparative analysis of tools for live cell imaging of actin  
765 network architecture. *Bioarchitecture* **4**, 189-202, (2014).
- 766 4 Laukaitis, C. M., Webb, D. J., Donais, K. & Horwitz, A. F. Differential dynamics of alpha 5 integrin,  
767 paxillin, and alpha-actinin during formation and disassembly of adhesions in migrating cells.  
768 *Journal of Cell Biology* **153**, 1427-1440, (2001).
- 769 5 Roh-Johnson, M., Shah, A. N., Stonick, J. A., Poudel, K. R., Kargl, J., Yang, G. H., di Martino, J.,  
770 Hernandez, R. E., Gast, C. E., Zarour, L. R., Antoku, S., Houghton, A. M., Bravo-Cordero, J. J., Wong,  
771 M. H., Condeelis, J. & Moens, C. B. Macrophage-Dependent Cytoplasmic Transfer during  
772 Melanoma Invasion In Vivo. *Dev. Cell* **43**, 549-562, (2017).
- 773 6 Le Berre, M., Zlotek-Zlotkiewicz, E., Bonazzi, D., Lautenschlaeger, F. & Piel, M. Methods for two-  
774 dimensional cell confinement. *Methods Cell Biol* **121**, 213-229, (2014).
- 775 7 Dean, K. M., Roudot, P., Welf, E. S., Danuser, G. & Fiolka, R. Deconvolution-free Subcellular  
776 Imaging with Axially Swept Light Sheet Microscopy. *Biophys. J.* **108**, 2807-2815, (2015).
- 777 8 Welf, E. S., Driscoll, M. K., Dean, K. M., Schafer, C., Chu, J., Davidson, M. W., Lin, M. Z., Danuser,  
778 G. & Fiolka, R. Quantitative Multiscale Cell Imaging in Controlled 3D Microenvironments. *Dev. Cell*  
779 **36**, 462-475, (2016).
- 780 9 Driscoll, M. K., Welf, E. S., Jamieson, A. R., Dean, K. M., Isogai, T., Fiolka, R. & Danuser, G. Robust  
781 and automated detection of subcellular morphological motifs in 3D microscopy images. *Nat*  
782 *Methods*, (2019).
- 783 10 Elliott, H., Fischer, R. S., Myers, K. A., Desai, R. A., Gao, L., Chen, C. S., Adelstein, R. S., Waterman,  
784 C. M. & Danuser, G. Myosin II controls cellular branching morphogenesis and migration in three  
785 dimensions by minimizing cell-surface curvature. *Nat. Cell Biol.* **17**, 137-147, (2015).

- 786 11 Lomakin, A. J., Cattin, C. J., Cuvelier, D., Alraies, Z., Molina, M., Nader, G. P. F., Srivastava, N., Saez,  
787 P. J., Garcia-Arcos, J. M., Zhitnyak, I. Y., Bhargava, A., Driscoll, M. K., Welf, E. S., Fiolka, R., Petrie,  
788 R. J., De Silva, N. S., Gonzalez-Granado, J. M., Manel, N., Lennon-Dumenil, A. M., Muller, D. J. &  
789 Piel, M. The nucleus acts as a ruler tailoring cell responses to spatial constraints. *Science* **370**,  
790 (2020).
- 791 12 Otsu, N. A threshold selection method from gray-level histograms. *IEEE Trans. Syst. Man, Cybern.*  
792 **9**, 62–66, (1979).
- 793 13 Manandhar, S., Bouthemy, P., Welf, E., Danuser, G., Roudot, P. & Kervrann, C. 3D flow field  
794 estimation and assessment for live cell fluorescence microscopy. *Bioinformatics* **36**, 1317-1325,  
795 (2020).
- 796 14 Roudot, P., Legant, W. R., Zou, Q., Dean, K. M., Welf, E. S., David, A. F., Gerlich, D. W., Fiolka, R.,  
797 Betzig, E. & Danuser, G. u-track 3D: measuring and interrogating intracellular dynamics in three  
798 dimensions. *BioRxiv*, (2020).
- 799 15 Goddard, T. D., Huang, C. C., Meng, E. C., Pettersen, E. F., Couch, G. S., Morris, J. H. & Ferrin, T. E.  
800 UCSF ChimeraX: Meeting modern challenges in visualization and analysis. *Protein Sci* **27**, 14-25,  
801 (2018).

802  
803  
804  
805  
806  
807  
808  
809  
810  
811  
812  
813  
814  
815  
816  
817  
818  
819  
820  
821  
822  
823  
824  
825  
826  
827  
828  
829  
830  
831



832 **Extended Data Figures and Legends**

833

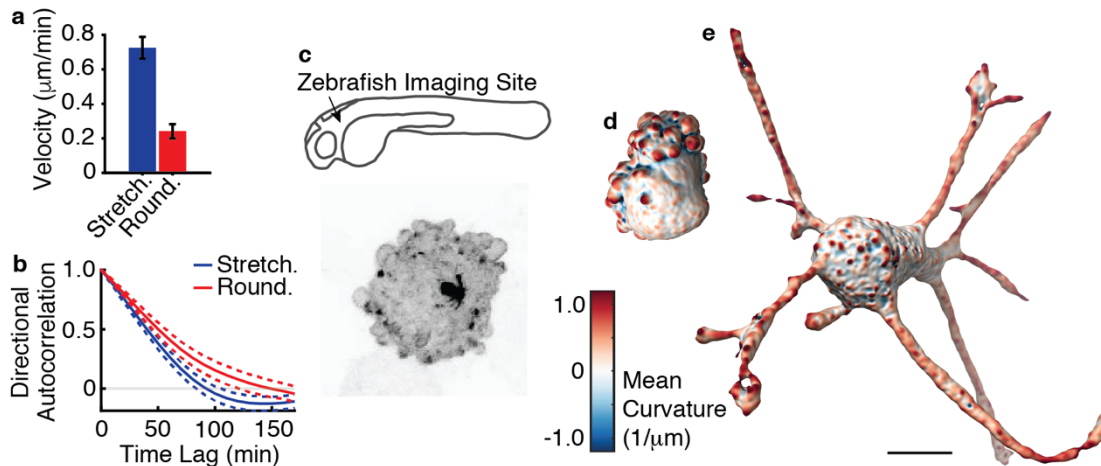

834

835 **Extended Data Figure 1. Melanoma cell morphology and migration.** (a) Mean instantaneous velocity of  
836 melanoma cells in 3D collagen, categorized by cell shape (n = 68 cells). (b) Directional persistence as  
837 measured by the directional autocorrelation of single cell trajectories, categorized by cell shape (n = 68  
838 cells). Greater lag times indicate more persistent migration. (c) Maximum intensity projection of a 3D  
839 confocal image of a B16 melanoma cell xenografted into a zebrafish embryo. The imaging site is indicated  
840 on the zebrafish schematic. Surface renderings of 3D light-sheet microscopy images of (d) amoeboid and  
841 (e) mesenchymal melanoma cells in 3D collagen. Scale bar is 10  $\mu\text{m}$ .

842

843

844

845

846

847

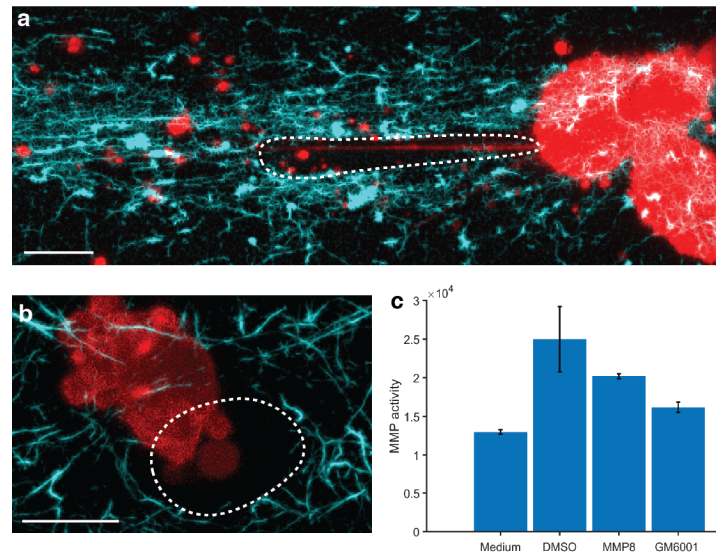

848

849 **Extended Data Figure 2. Digging tunnels through 3D collagen.** (a) Maximum intensity projection across  
850 3.2  $\mu\text{m}$  (20 slices) of a light-sheet microscope image of two MV3 melanoma cells expressing GFP-AktPH  
851 (red) in 3D collagen (cyan). The white dashed line indicates the location of a tunnel. (b) Maximum intensity  
852 projection across 18  $\mu\text{m}$  of a light-sheet microscope image of an Ewing sarcoma cell expressing GFP-F-  
853 tractin (red) in 3D collagen (cyan). The white dashed line indicates the location of a tunnel. The collagen  
854 images in a & b were computationally enhanced by a steerable line filter amplifying collinear structures,  
855 and in both panels the scale bars show 10  $\mu\text{m}$ . (c) MMP activity is evaluated by measuring fluorescence  
856 resonance energy transfer (FRET) fluorescence of a generic MMP peptide, measured via plate reader. In  
857 the intact FRET peptide, the fluorescence of one part is quenched by another. After cleavage into two  
858 separate fragments by MMPs, the fluorescence is recovered. 'Medium' shows MMP activity of DMEM cell  
859 culture medium with FBS but no cell contact. 'DMSO' shows activity of cell culture medium incubated with  
860 cells and DMSO vehicle as control for 24 hours. 'MMP8' shows the activity of purified MMP8 protein  
861 dissolved in sample measurement buffer. 'GM6001' shows the activity of cell culture medium incubated  
862 with cells and 40  $\mu\text{M}$  GM6001 for 24 hours. P value via two sample t-test for the comparison between  
863 DMSO and GM6001 is 0.0068,  $n = 4$  separate culture wells for each condition. Error bars show 95%  
864 confidence interval.

865

866

867

868

869

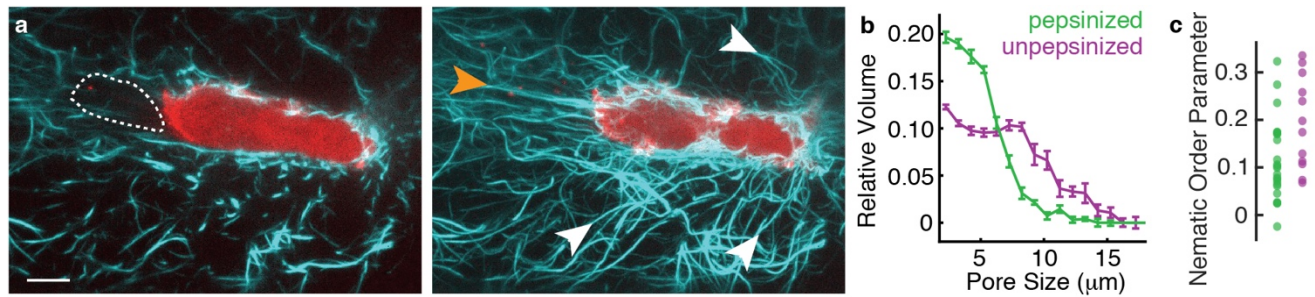

870

871 **Extended Data Figure 3. Comparing path generation in pepsinized and unpepsinized collagen.** (a)  
872 Maximum intensity projections of a single light-sheet microscope image of an MV3 melanoma cell  
873 expressing GFP-AktPH (red) in pepsinized 3D collagen with fibers enhanced (cyan), projected across 1.1  
874 μm (left) and 8.2 μm (right). In the left panel, the white dashed line indicates the location of a tunnel  
875 behind the cell. In the right panel, the orange arrow indicates a collagen fiber being dragged behind the  
876 cell, and the white arrows indicate collagen fibers being dragged from the sides in the cell's wake. Scale  
877 bar show 10 μm. (b) Pore size analysis of pepsinized and unpepsinized 3D collagen samples. Error bars  
878 indicate the standard error of the mean (n=6 gels per condition). The pepsinized data was shown in 1b.  
879 (c) Nematic order parameter quantifying the extent of collagen fiber alignment in images of pepsinized  
880 and unpepsinized 3D collagen containing cells (difference between conditions per a one-sided t-test, p =  
881 0.009). A mean nematic order parameter of 1 indicates high fiber alignment and 0 indicates no overall  
882 alignment.

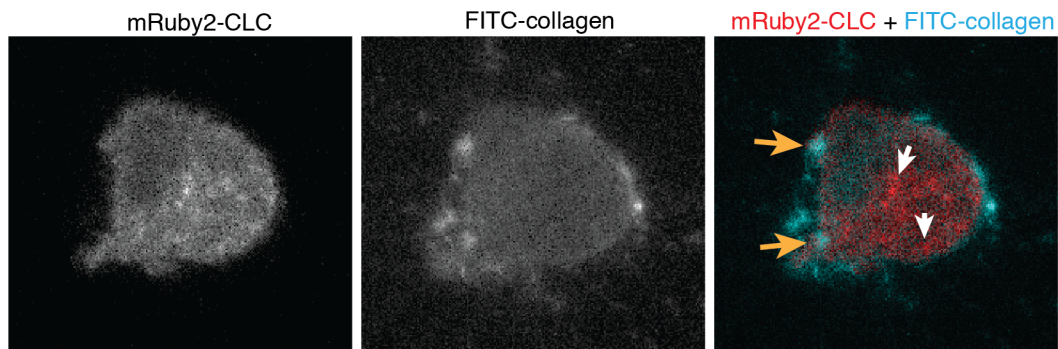

883

884 **Extended Data Figure 4. Spatial location of internalized collagen and clathrin-containing vesicles.** Images  
885 show a single optical slice of a 3D light sheet microscope image of an MV3 melanoma cell expressing  
886 mRuby2-CLC in FITC-labeled 3D collagen. Orange arrows indicate internalized collagen fragments and  
887 white arrows indicate clathrin-containing vesicles.

888

889

890

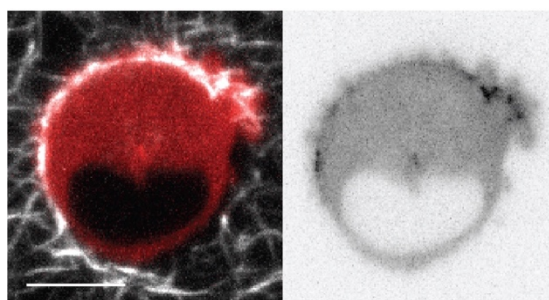

891  
892 **Extended Data Figure 5. Adhesion localization.** (E) Maximum intensity projections across 0.8  $\mu\text{m}$  of a  
893 light-sheet microscope image of a melanoma cell expressing GFP-paxillin (red in left image, black in right  
894 image) in 3D collagen (white in left image). Scale bar indicates 10  $\mu\text{m}$ .

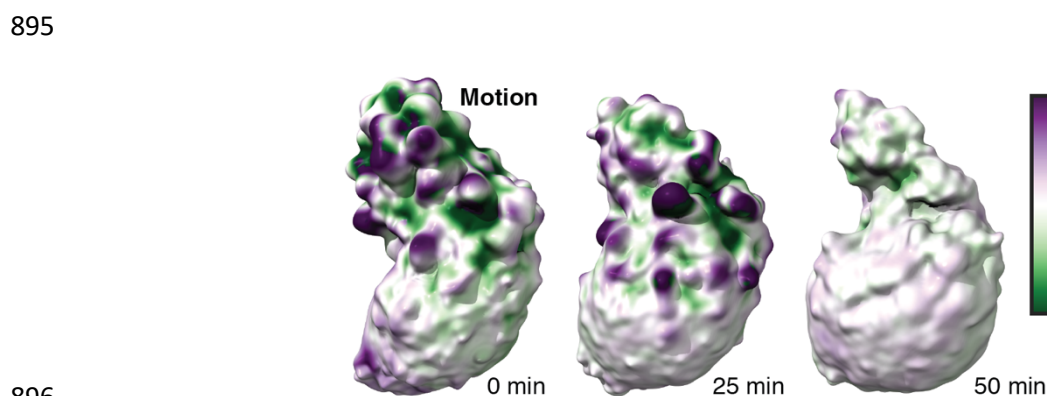

896  
897 **Extended Data Figure 6. Surface motion of a melanoma cell treated with FAK inhibitor 14.** Surface  
898 renderings colored by local surface motion of the cell analyzed in 3k. Purple indicates protrusive regions,  
899 whereas green indicates retractive regions. Panel 3f shows PI3K activity localization on the same cell prior  
900 to treatment.

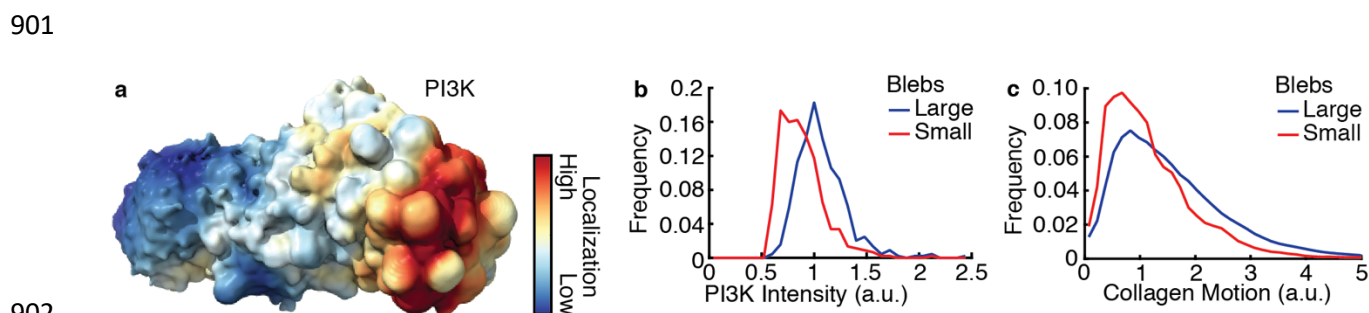

902  
903 **Extended Data Figure 7. PI3K localization is associated with large blebs.** (a) A surface rendering of a light-  
904 sheet microscope image of a melanoma cell in collagen, colored by the localization of GFP-AktPH. A  
905 timelapse of the same cell is shown in Movie 5. (b) Relative frequency distributions of GFP-AktPH near the  
906 cell surface reporting PI3K products in large blebs (top decile by volume) vs small blebs (bottom decile by  
907 volume) ( $n = 34$  cells). (c) Frequency distributions of collagen motion near cell surfaces of large blebs (top  
908 decile by volume) vs small blebs (bottom decile by volume) ( $n = 6$  cells).

909



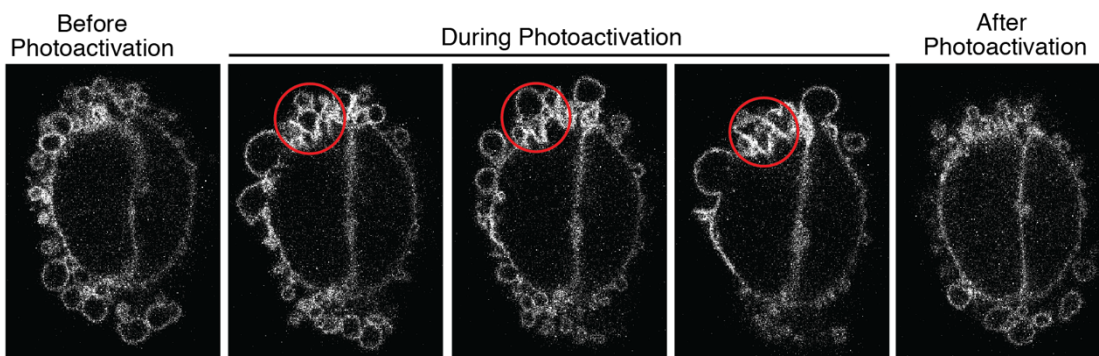

910

911 **Extended Data Figure 8. PI3K photoactivation.** Spinning disk confocal microscope images showing a single  
912 optical slice of GFP-AktPH biosensor localization in an MV3 cell before, during and after photoactivation  
913 of PI3K in the area indicated by a red circle.

914

915

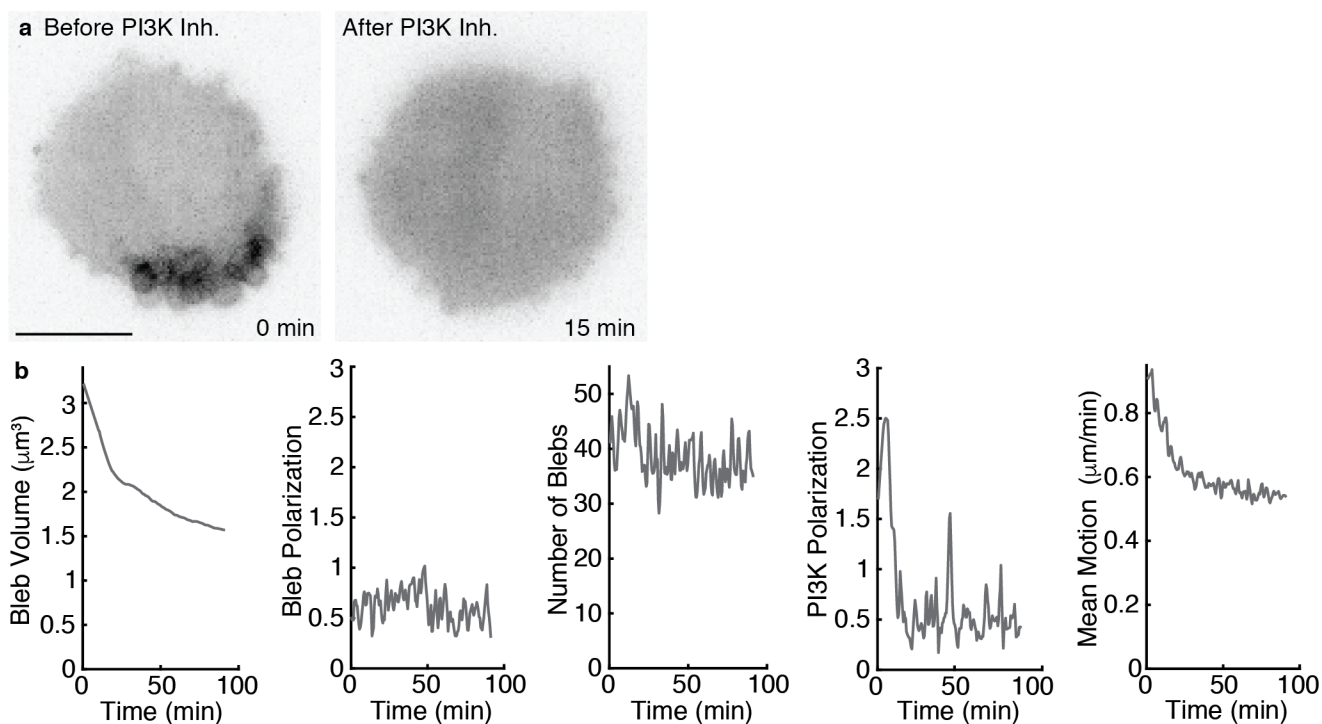

916

917 **Extended Data Figure 9. PI3K inhibition.** (a) Maximum intensity projections across 1.6  $\mu\text{m}$  of a light-sheet  
918 microscope image of an MV3 cell expressing GFP-AktPH, before and after PI3K inhibition. Scale bar shows  
919 10  $\mu\text{m}$ . (b) Temporal response of a different MV3 cell treated with PI3K $\alpha$  inhibitor IV. From left to right,  
920 shown are mean bleb volume, bleb polarization magnitude, number of blebs, PI3K polarization  
921 magnitude, and mean surface motion magnitude.

922

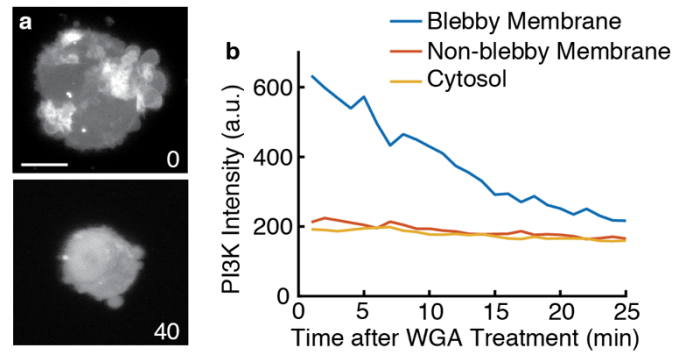

923

924 **Extended Data Figure 10. Wheat Germ Agglutinin (WGA) treatment.** (a) Maximum intensity projections  
925 of light-sheet microscope images of representative melanoma cells treated with 0 μg/mL or 40 μg/mL  
926 WGA. Scale bar shows 10 μm. (b) PI3K intensity as a function of time after WGA treatment in different  
927 regions of a cell.

928

929

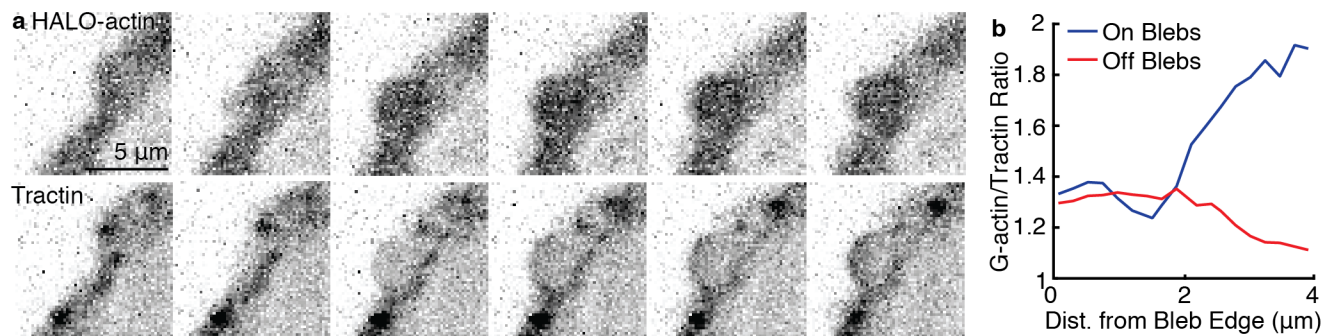

930

931 **Extended Data Figure 11. HALO-actin and tractin localization within blebs.** (a) Time-lapse maximum  
932 intensity projections across 3.2 μm of HALO-actin (total actin) and GFP-F-tractin in an MV3 cell. Volumes  
933 were acquired every 4.3 sec. (b) Actin/tractin ratio on and off blebs as a function of distance from the bleb  
934 neck (n = 5 cells).

935

936

937

938

939

940

941

942

943

944 **Movie Legends.**

945 **Movie 1. Collagen movement in soft collagen.** Single optical slice of a light sheet fluorescence time-lapse  
946 series showing motion of collagen labeled with Alexafluor 568 in the proximity of a single melanoma cell  
947 (unlabeled).

948 **Movie 2. Collagen network surrounding a melanoma cell.** Movie animates stepping through single slices  
949 of a light sheet fluorescence image of collagen labeled with Alexafluor 568 along with a single melanoma  
950 cell showing local surface curvature mapped to the surface of the cell.

951 **Movie 3. A cell tunneling through collagen.** Movie shows a time-lapse sequence of a single slice of a light  
952 sheet microscope image of a melanoma cell expressing GFP-AktPH (green) and collagen (red).

953 **Movie 4. Animation showing blebs identified by u-shape 3D.** Movie shows rotation of a 3D rendering of  
954 the surface of a single melanoma cell, imaged using light sheet microscopy. Blebs identified by u-shape  
955 3D are shown in different colors.

956 **Movie 5. PI3K polarity in a migrating cell.** Movie shows a time-lapse sequence of the surface of light sheet  
957 microscope images of a melanoma cell expressing GFP-AktPH. The local intensity of GFP-AktPH is  
958 projected onto the surface of the cell, according to the colormap shown in Extended Data Figure 7a.

959 **Movie 6. Photoactivation of PI3K in a blebbing cell.** Time-lapse sequence of a single optical section of a  
960 confocal microscope acquisition of an MV3 cell expressing GFP-AktPH. Photoactivation of Cry2-iSH2/CIBN-  
961 CAAX occurred via activation of the FRAP module in the location and time shown by the green circle.
